# Supplementary material for: Synthesis of novel cyclosiloxane monomers containing push–pull moieties and their anionic ring opening polymerization
Source: Royal Society of Chemistry journal article supplement (doi:10.1039/c8ra00707a), 2018-01-01
Supplement: c8ra00707a1.pdf [file c8ra00707a1.pdf]

## Supporting information

# Synthesis of novel cyclosiloxane monomers containing push-pull moieties and their anionic ring opening polymerization

Elena Perju,<sup>a,b</sup> Eduardo Cuervo-Reyes,<sup>c</sup> Sergiu Shova,<sup>b</sup> and Dorina M. Opris<sup>a\*</sup>

<sup>a</sup> Swiss Federal Laboratories for Materials Science and Technology Empa, Laboratory for Functional Polymers, Ueberlandstr. 129, CH-8600, Dübendorf, Switzerland, Dorina.opris@empa.ch.

<sup>b</sup> "Petru Poni" Institute of Macromolecular Chemistry of Romanian Academy, Aleea Gr. Chica Voda, 41A, 700487, Iasi, Romania.

<sup>c</sup> Swiss Federal Laboratories for Materials Science and Technology Empa, Laboratory for Energy Conversion, Ueberlandstr. 129, CH-8600, Dübendorf, Switzerland.

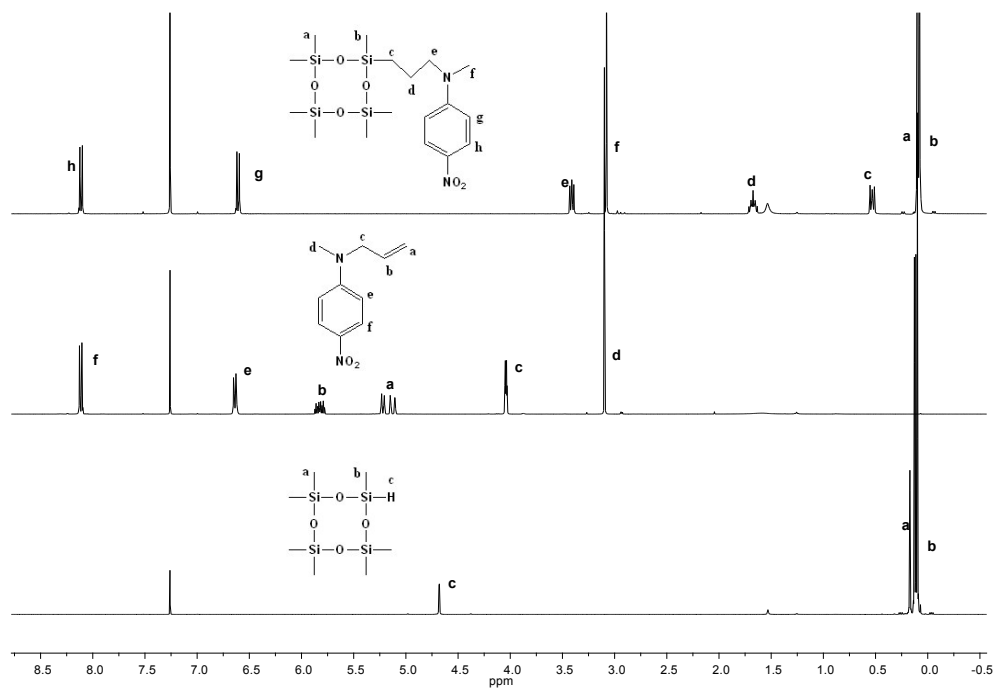

Figure S1: <sup>1</sup>H NMR spectra of D<sub>4</sub>H, N-allyl-N-methyl-4-nitroaniline and the cyclosiloxane monomer **3**.

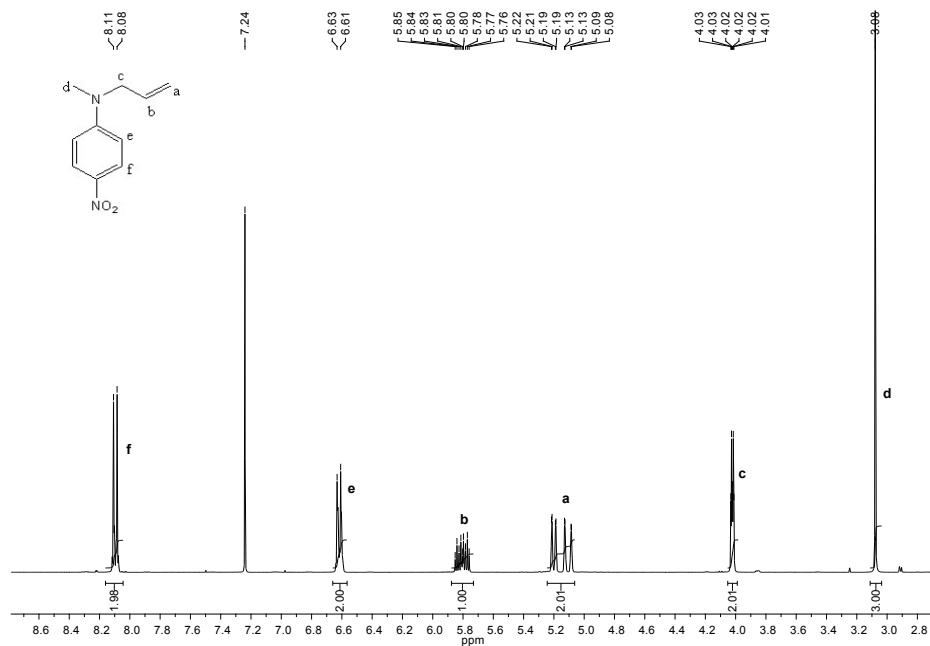

Figure S2: <sup>1</sup>H NMR spectrum of N-allyl-N-methyl-4-nitroaniline **2**.

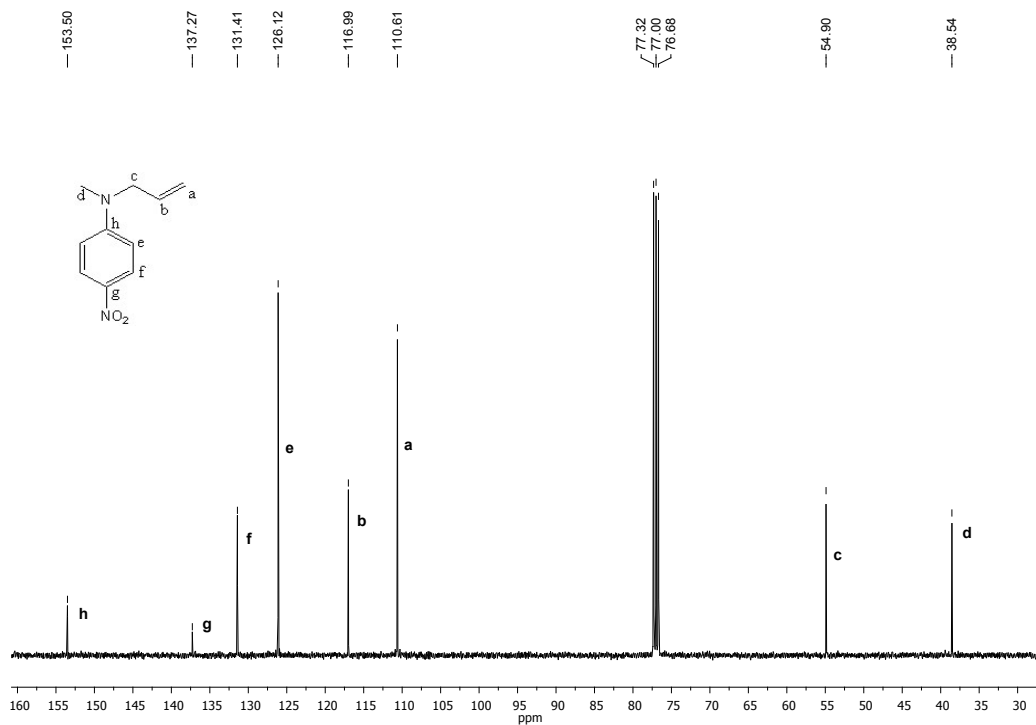

Figure S3: <sup>13</sup>C NMR spectrum of N-allyl-N-methyl-4-nitroaniline **2**.

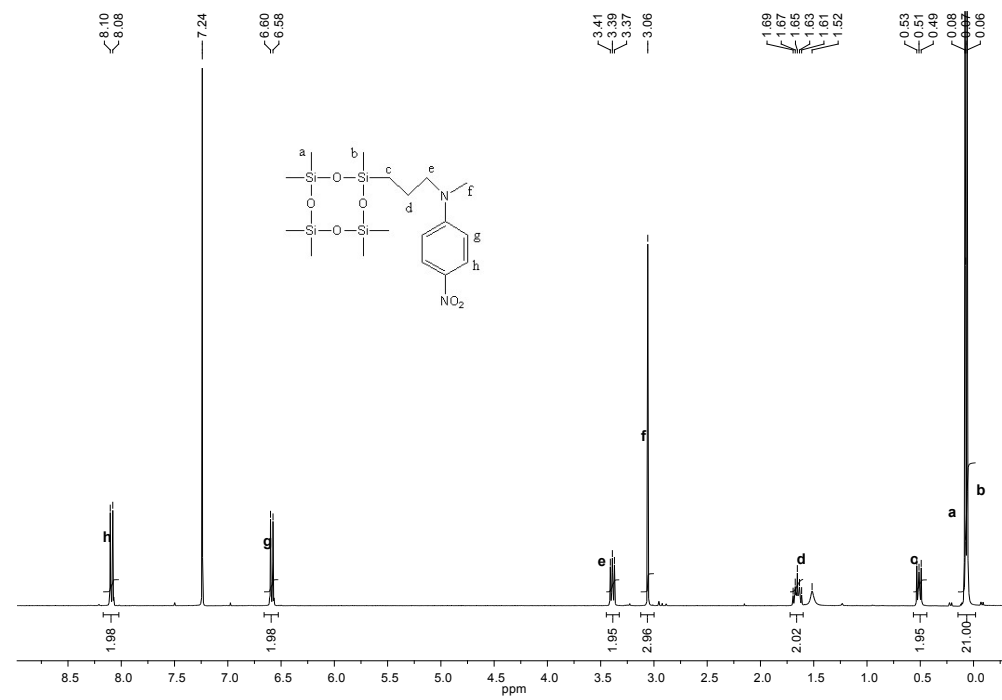

Figure S4: <sup>1</sup>H NMR spectrum of **3**.

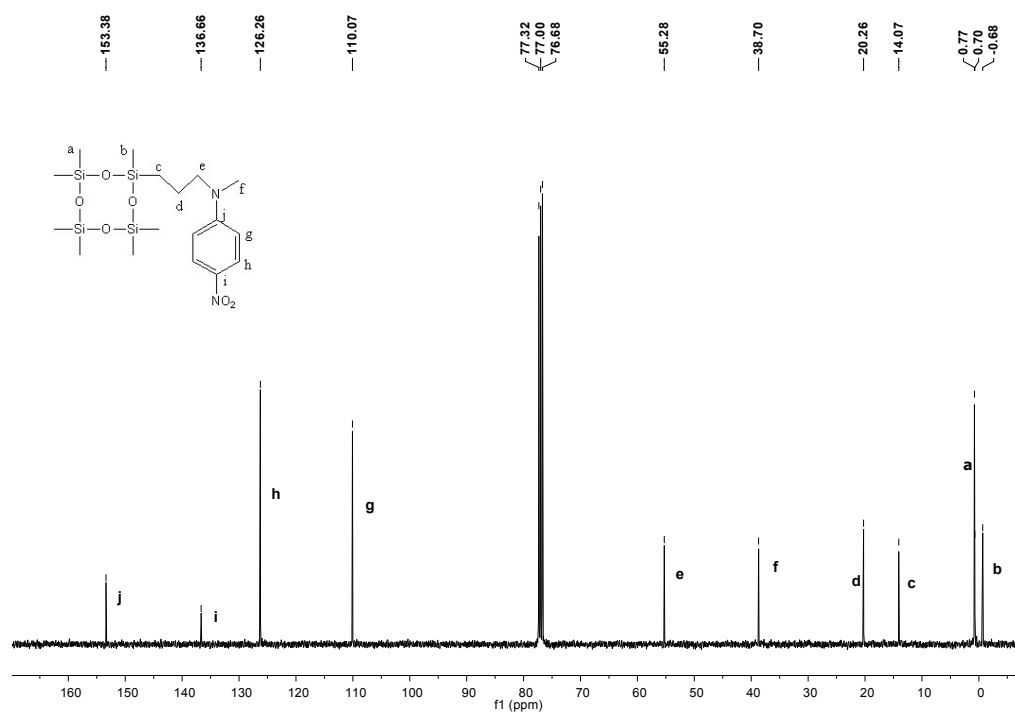

Figure S5: <sup>13</sup>C NMR spectrum of **3**.

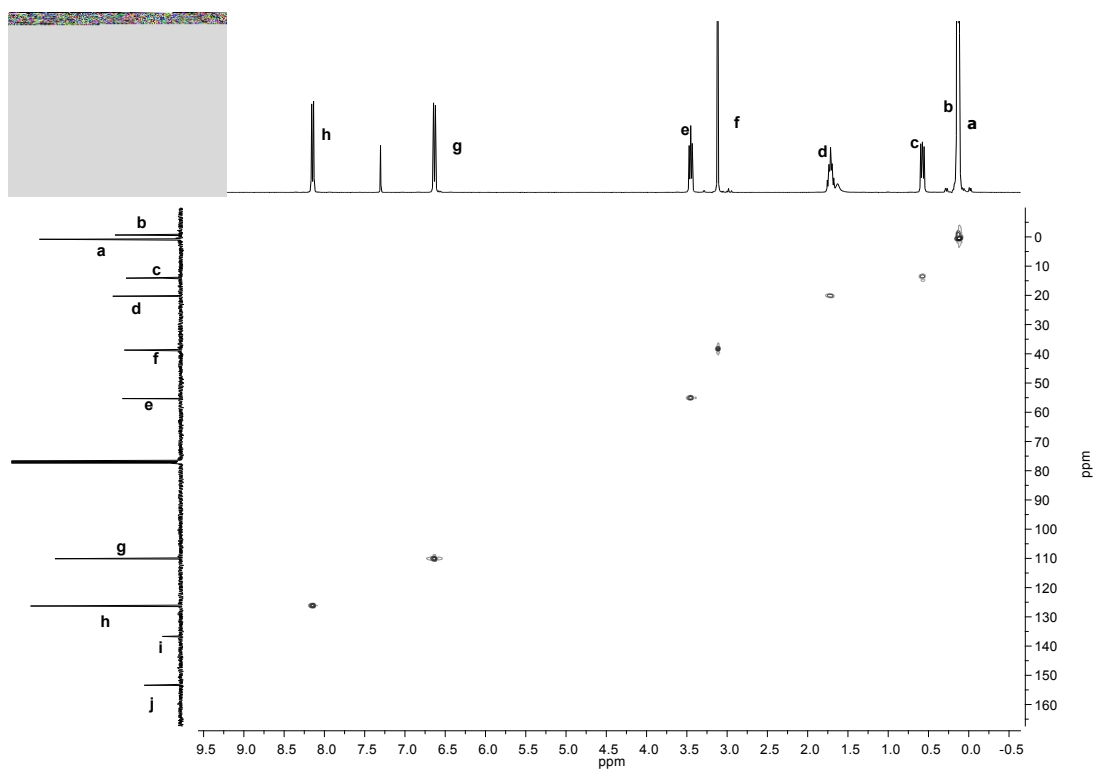

Figure S6: HSQC spectrum of **3**.

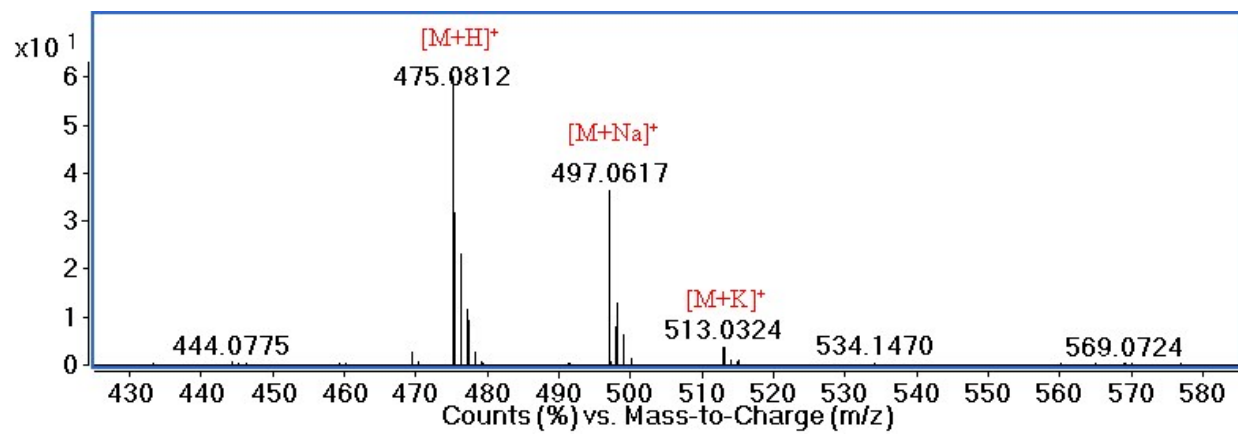

Figure S7: ESI – mass spectrum of **3**.



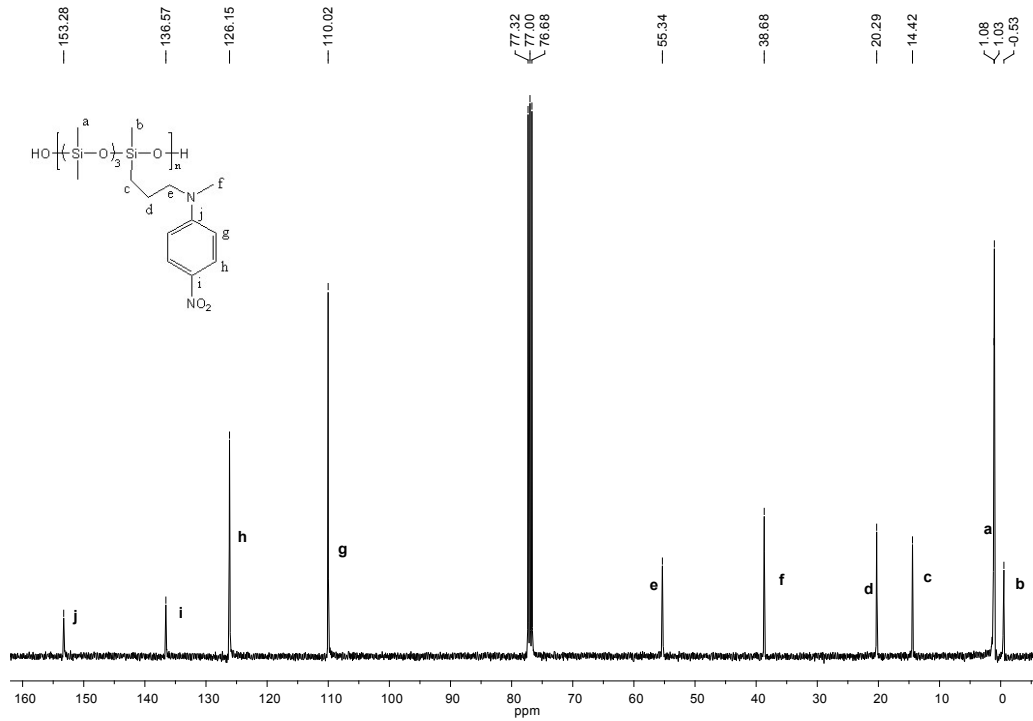

Figure S10:  $^{13}\text{C}$  NMR spectrum of P-NA.

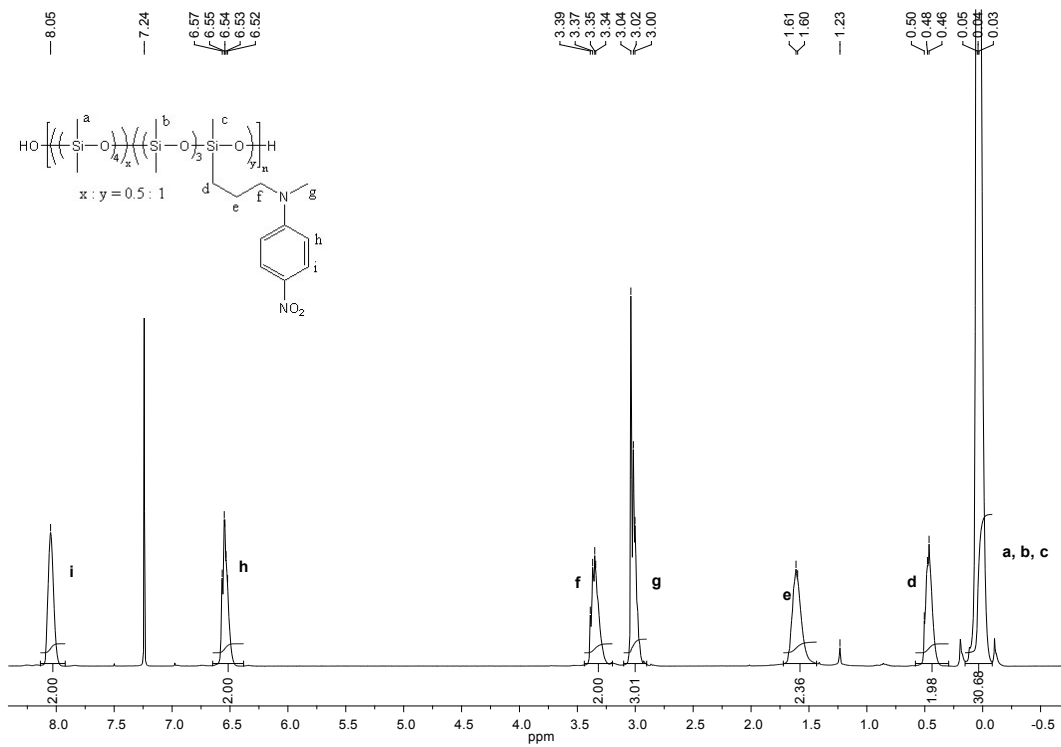

Figure S11:  $^1\text{H}$  NMR spectrum of co-P-NA (1:2).

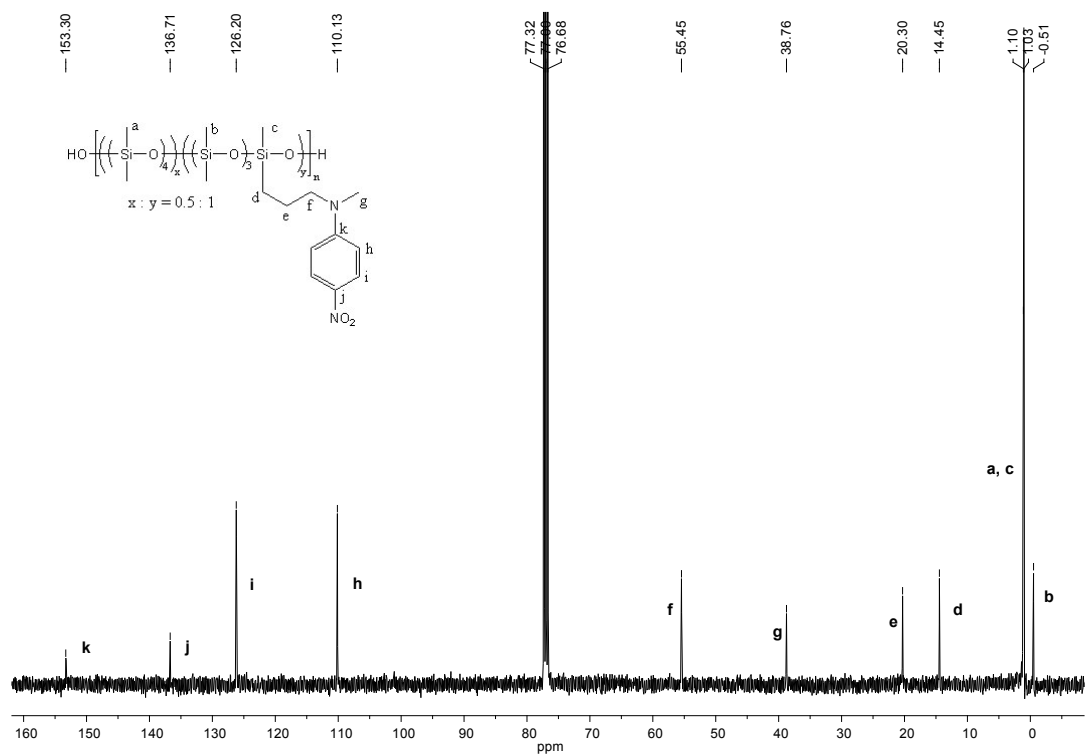

Figure S12: <sup>13</sup>C NMR spectrum of *co-P-NA* (1:2).

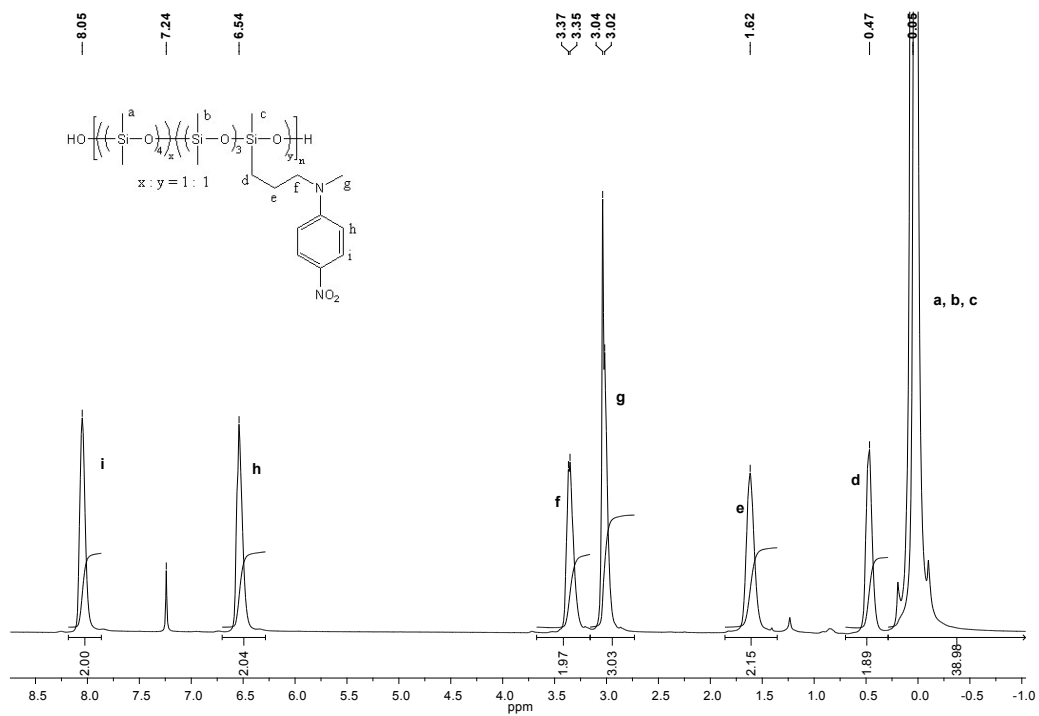

Figure S13: <sup>1</sup>H NMR spectrum of *co-P-NA* (1:1).

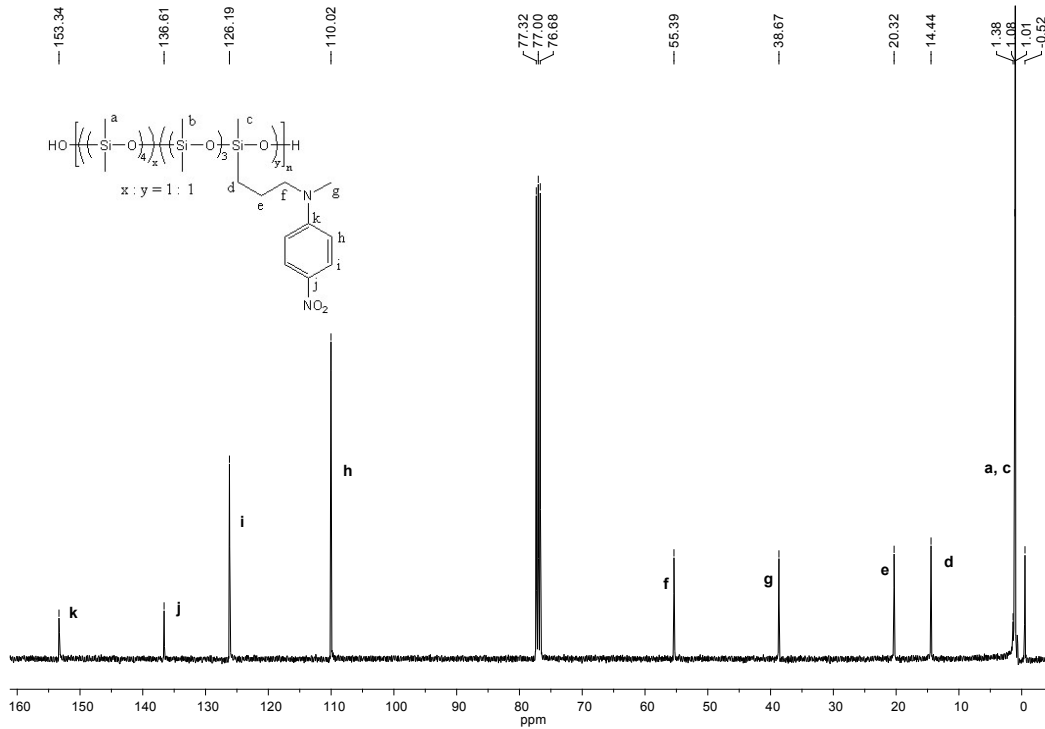

Figure S14:  $^{13}\text{C}$  NMR spectrum of *co-P-NA* (1:1).

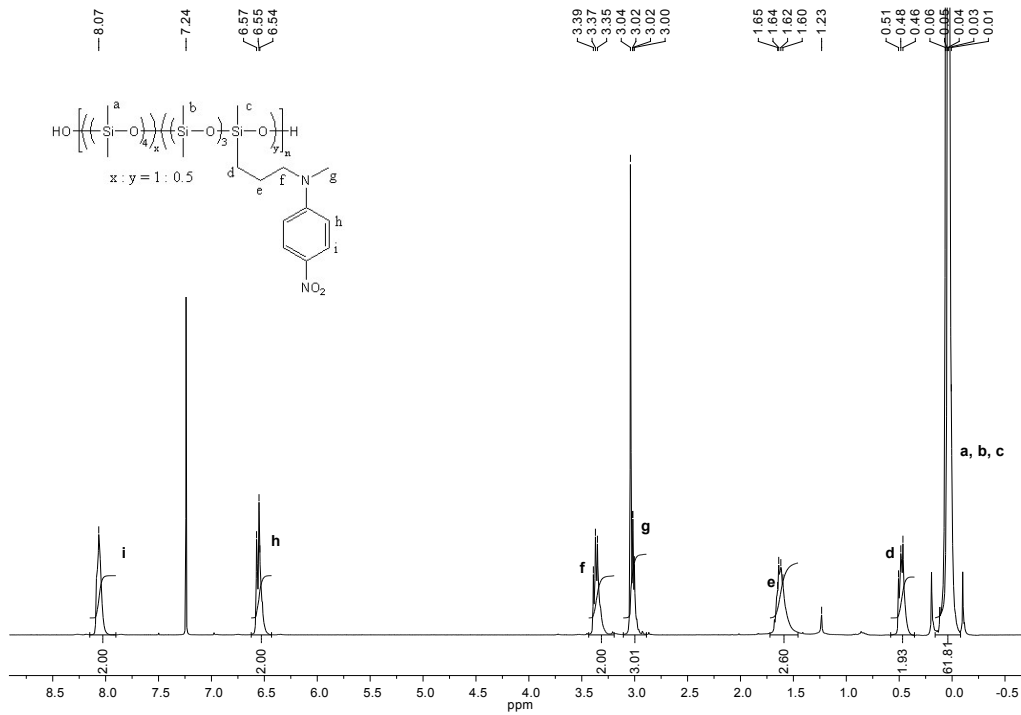

Figure S15:  $^1\text{H}$  NMR spectrum of *co-P-NA* (2:1).



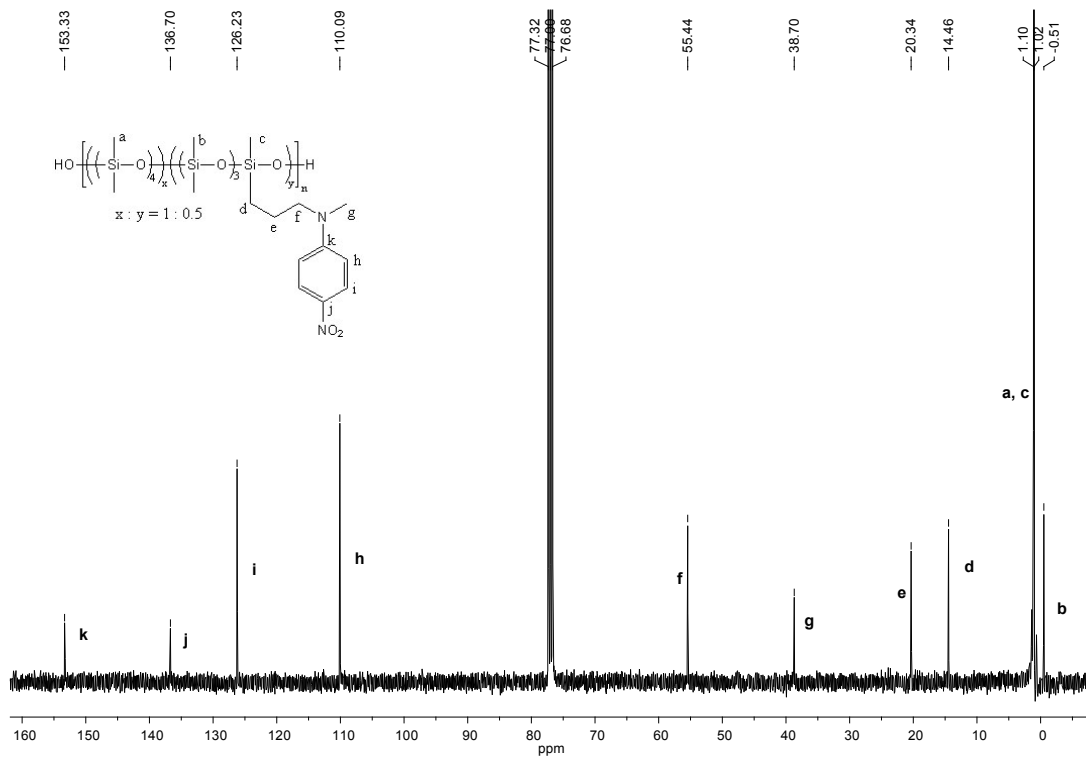

Figure S16: <sup>13</sup>C NMR spectrum of *co*-P-NA (2:1).

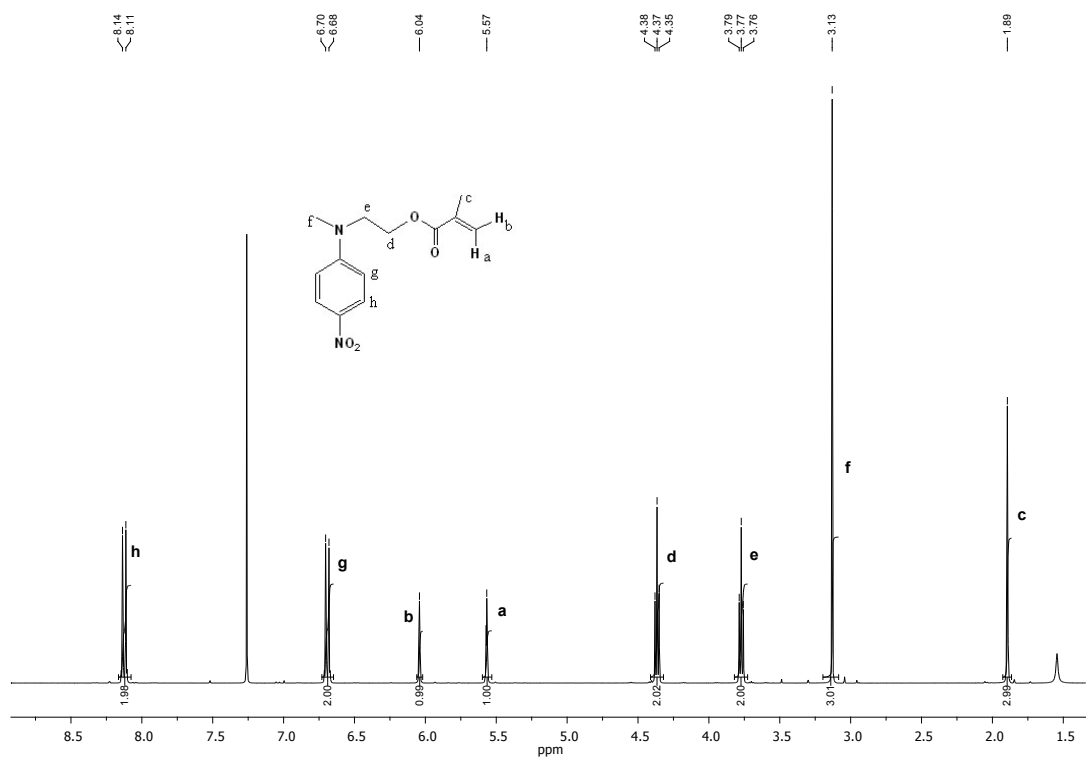

Figure S17: <sup>1</sup>H NMR spectrum of 5.

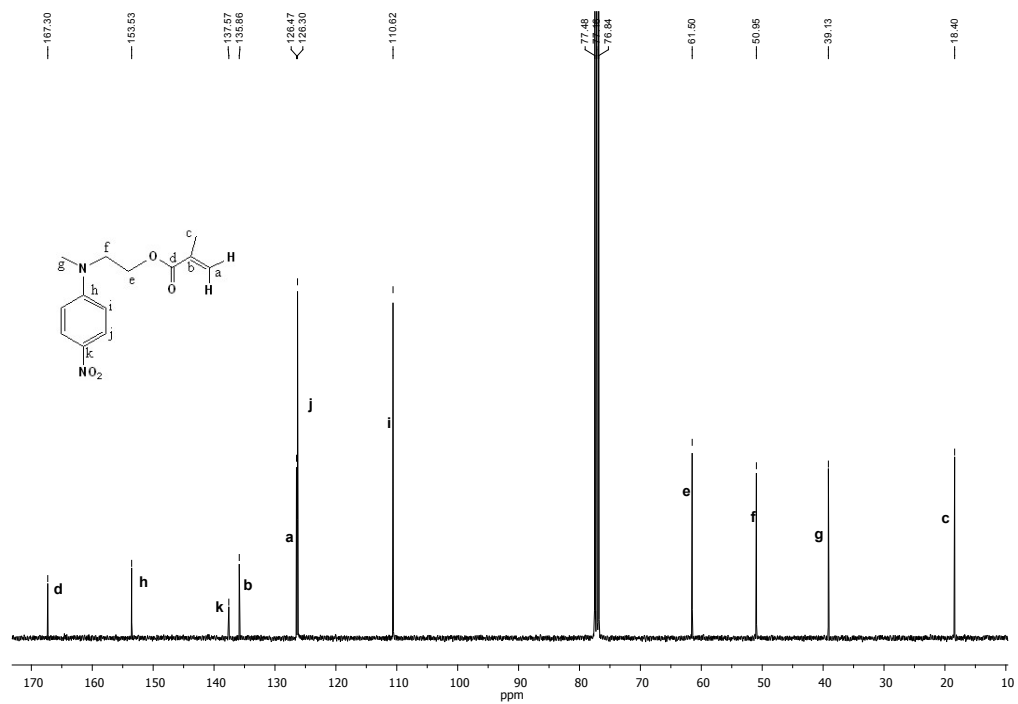

Figure S18:  $^{13}\text{C}$  NMR spectrum of 5.

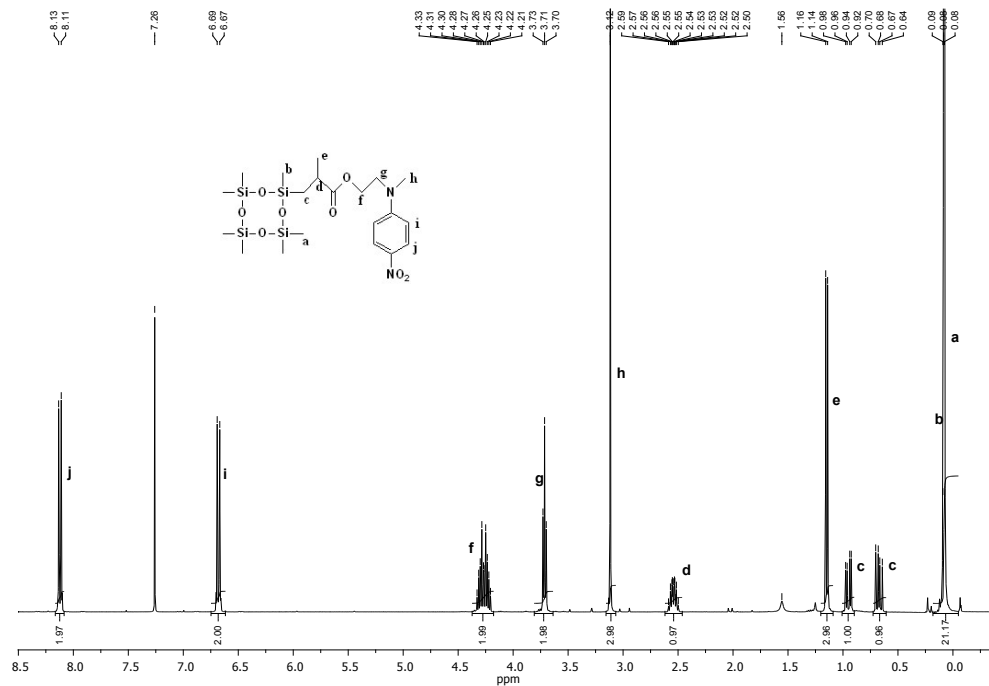

Figure S19:  $^1\text{H}$  NMR spectrum of 6.

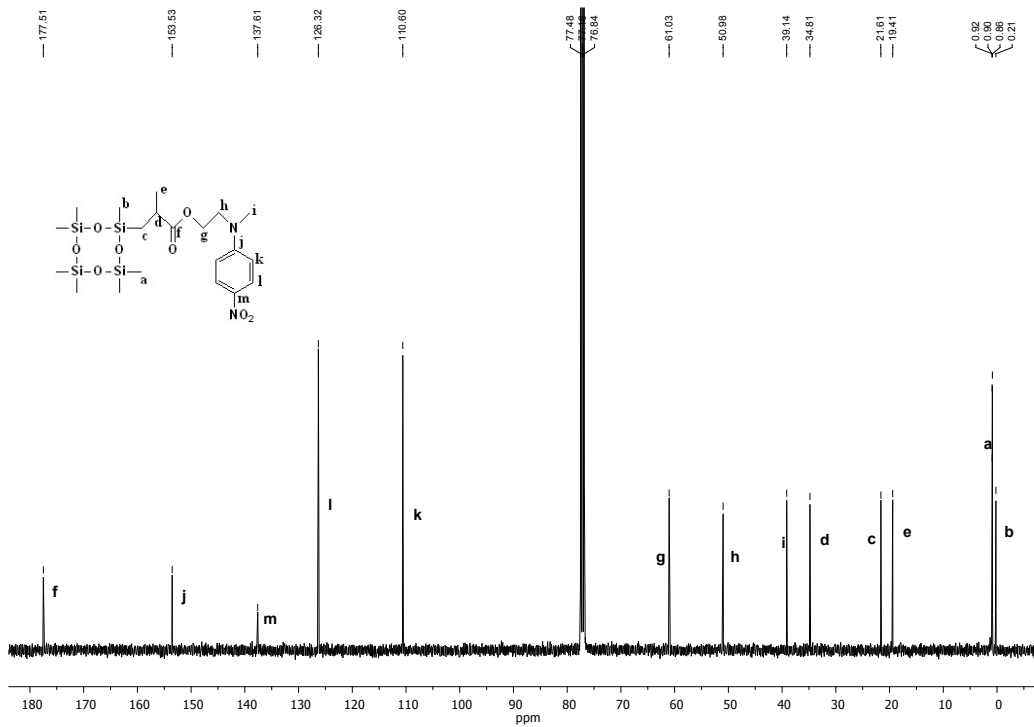

Figure S20:  $^{13}\text{C}$  NMR spectrum of 6.

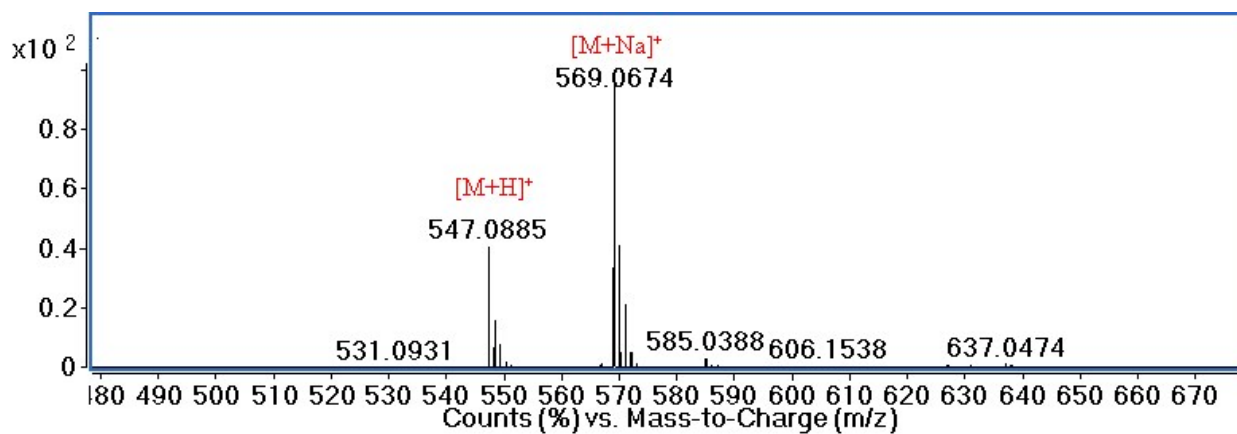

Figure S21: ESI – mass spectrum of 6.

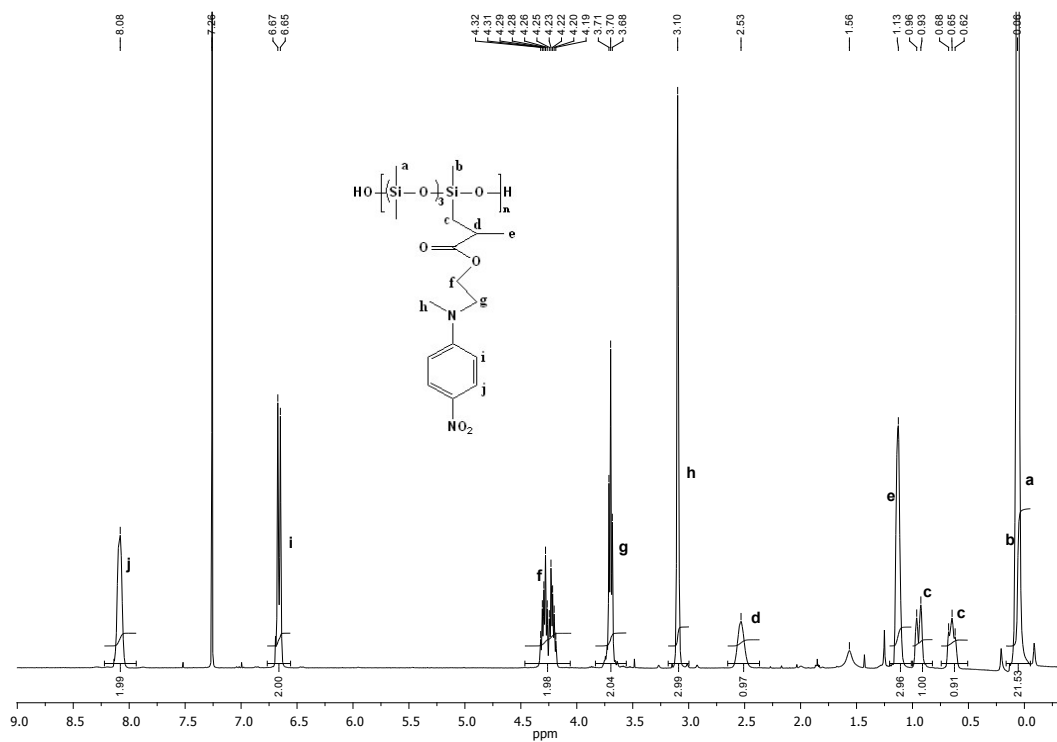

Figure S22: <sup>1</sup>H NMR spectrum of P-MNA.

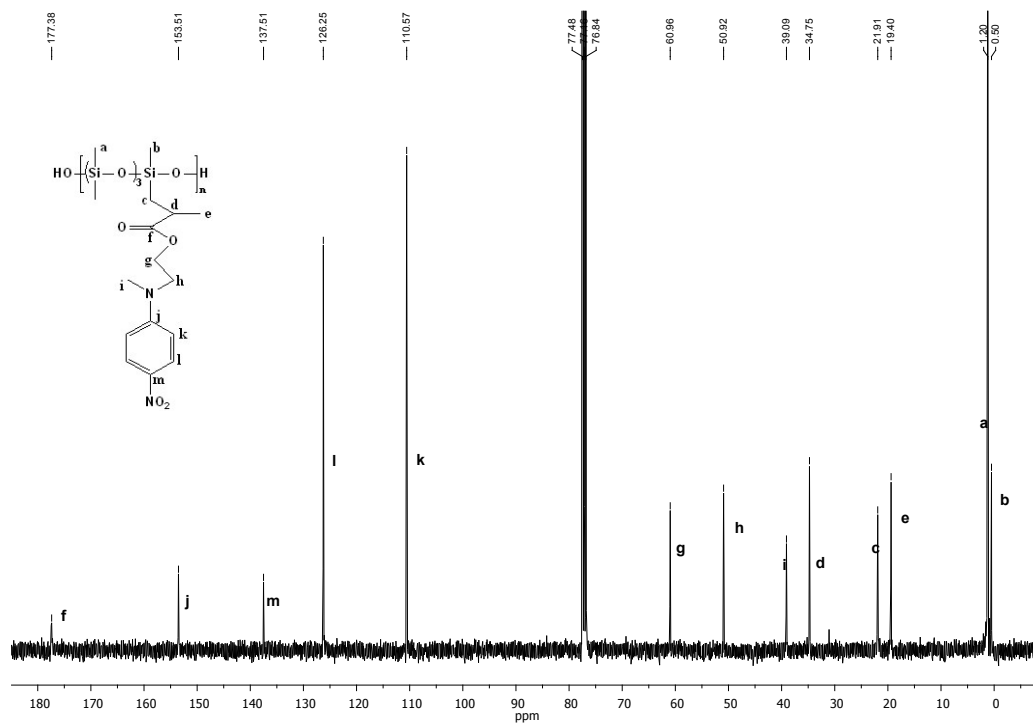

Figure S23: <sup>13</sup>C NMR spectrum of P-MNA.

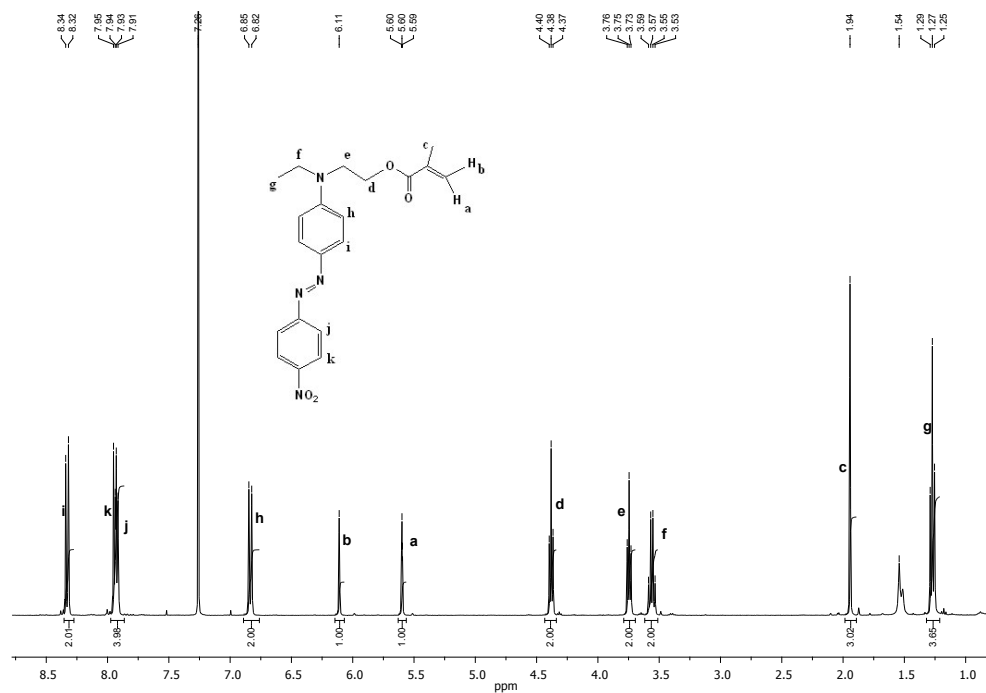

Figure S24:  $^1\text{H}$  NMR spectrum of **8**.

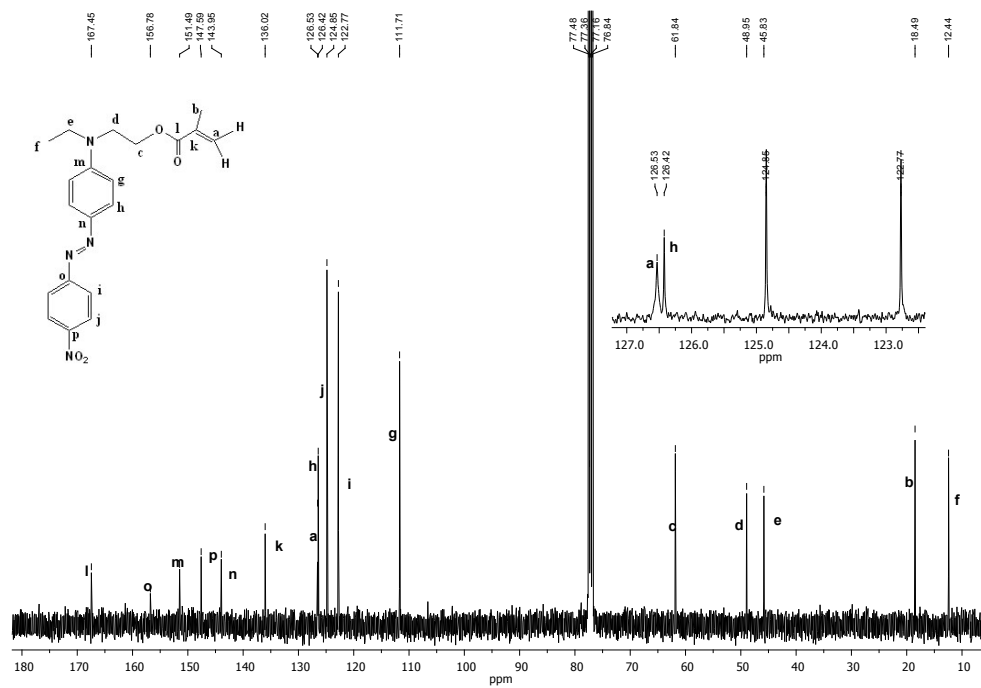

Figure S25:  $^{13}\text{C}$  NMR spectrum of **8**.

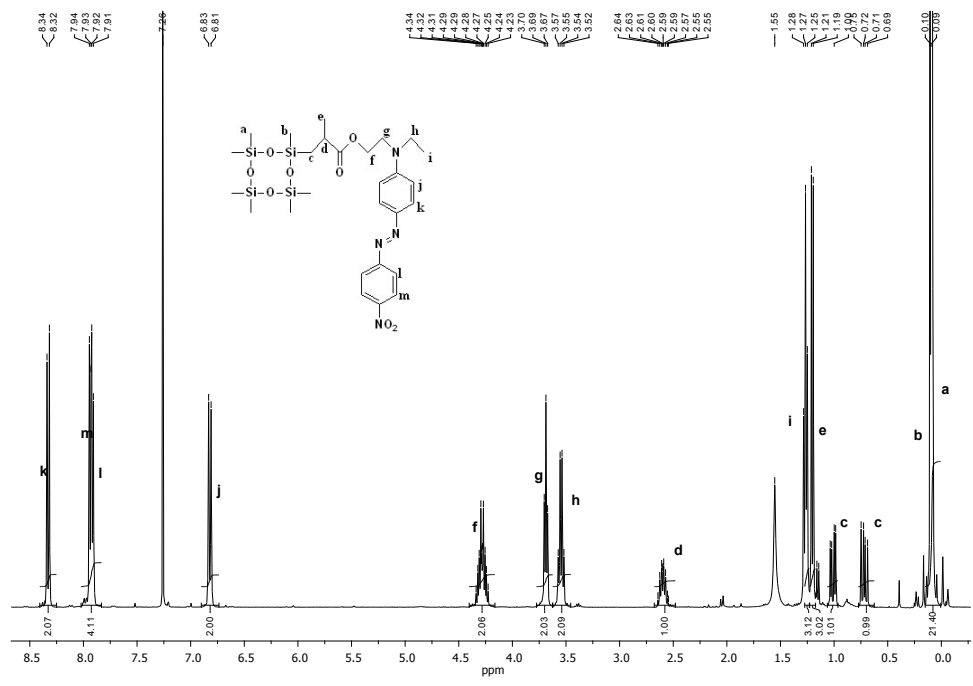

Figure S26:  $^1\text{H}$  NMR spectrum of **9**.

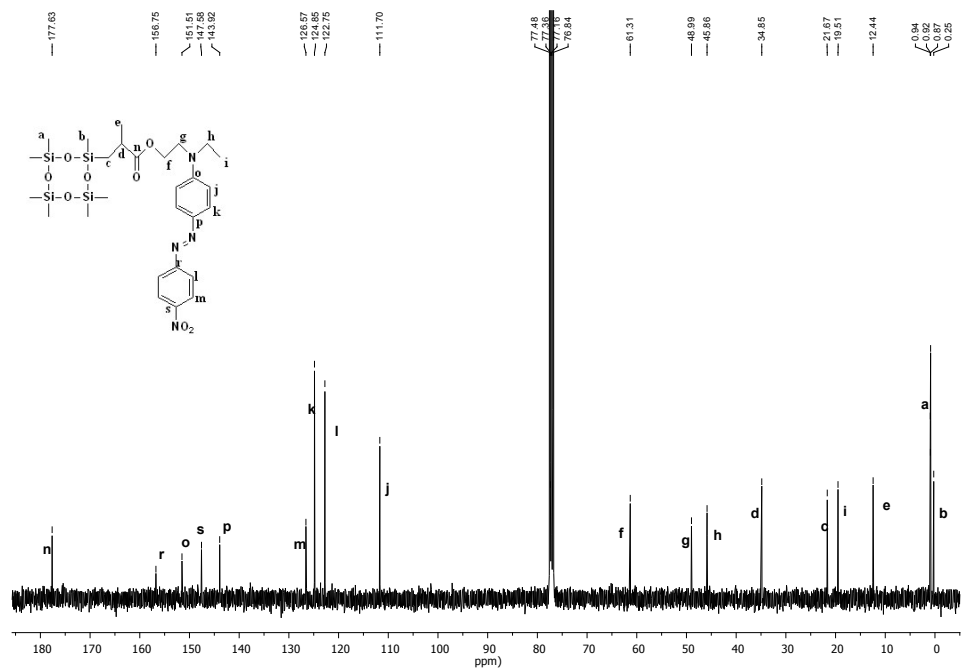

Figure S27:  $^{13}\text{C}$  NMR spectrum of **9**.

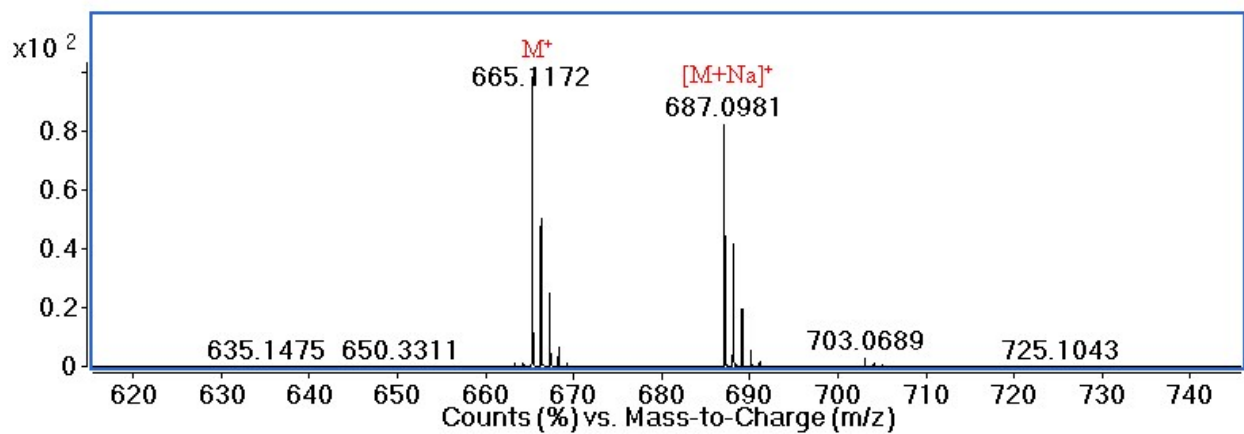

Figure S28: ESI – mass spectrum of 9.

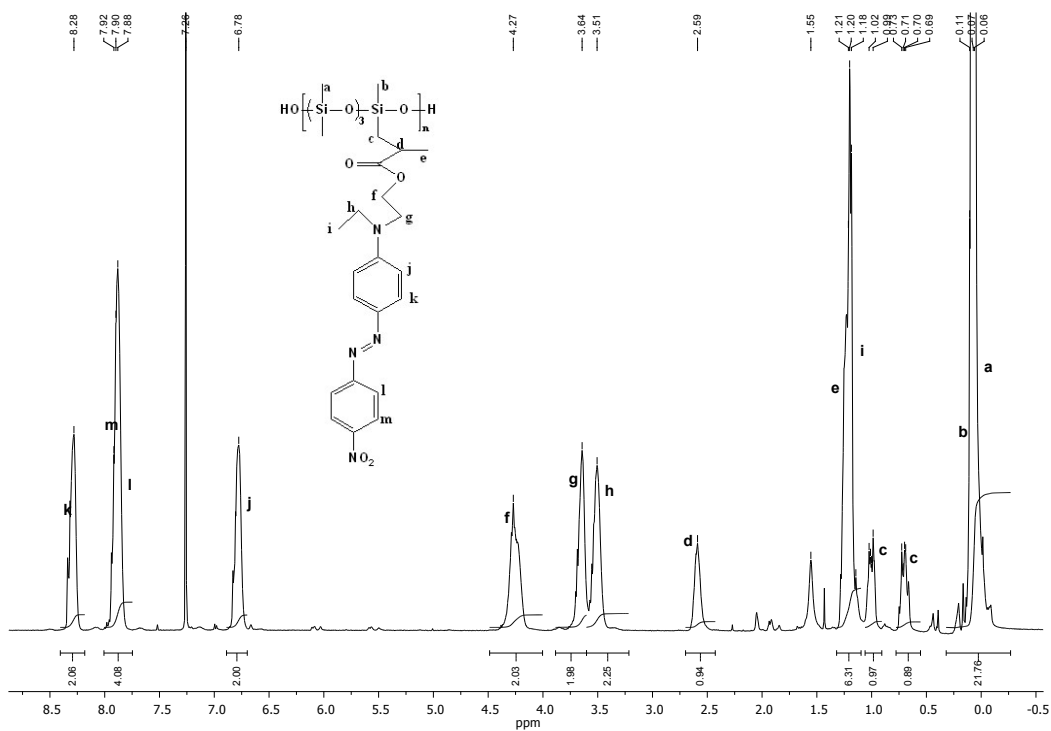

Figure S29:  $^1\text{H}$  NMR spectrum of P-MDR1.

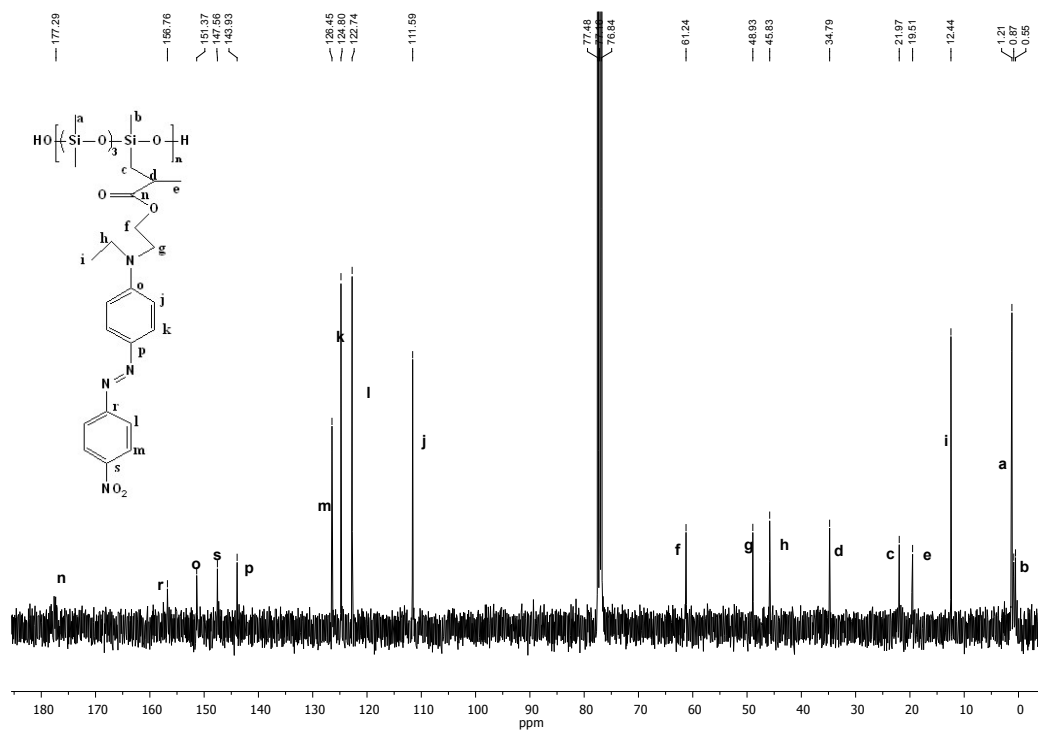

Figure S30:  $^{13}\text{C}$  NMR spectrum of P-MDR1.

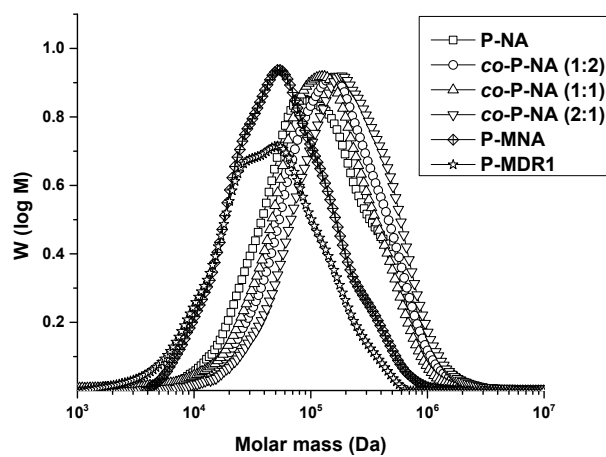

Figure S31. GPC elugrams of P-NA, co-P-NA(x:y), P-MNA, and P-MDR1 in THF.



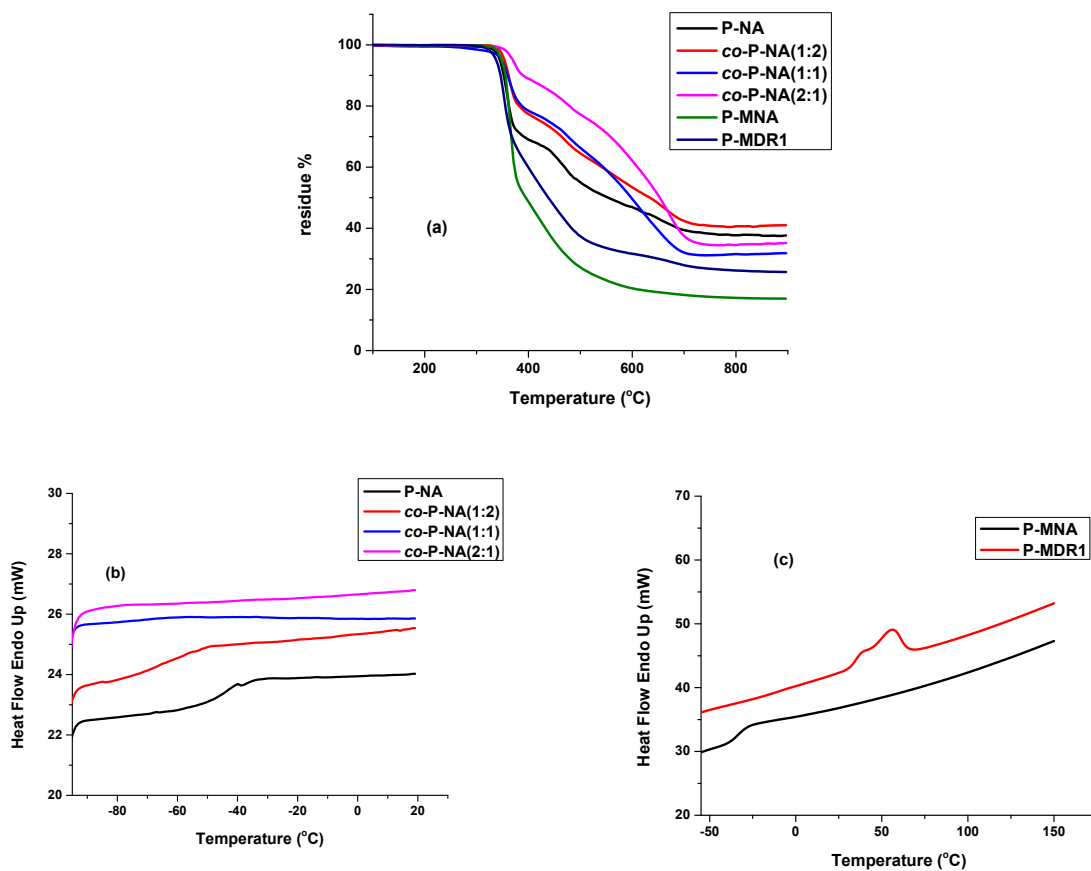

Figure S32. TGA (a) and DSC (b,c) traces of P-NA, *co*-P-NA(*x*:*y*), P-MNA, and P-MDR1.

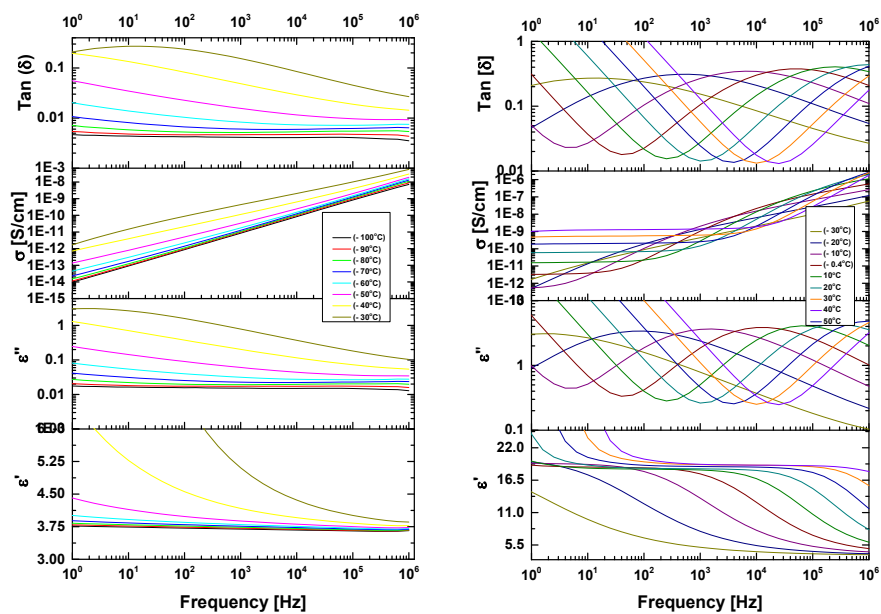

Figure S33: Dielectric properties of the P-NA as function of frequency at different temperature.

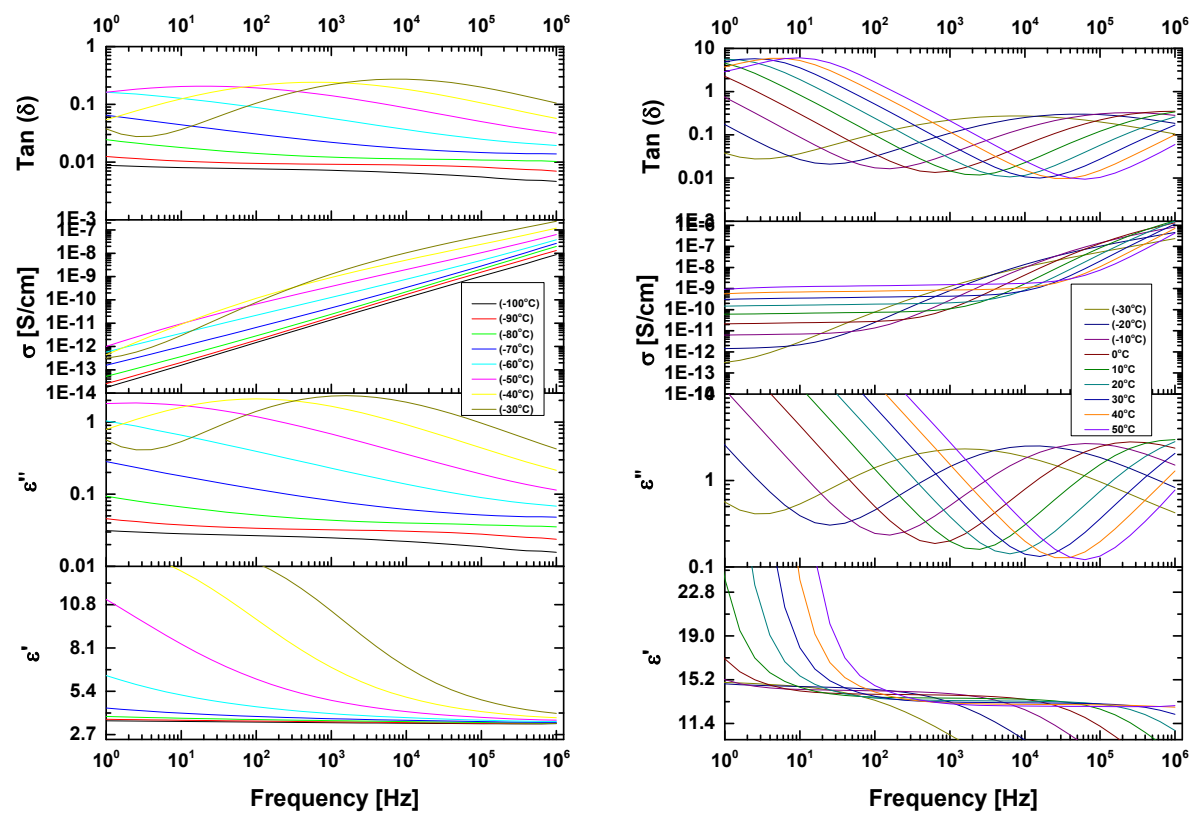

Figure S34: Dielectric properties of the *co-P-NA(1:2)* as function of frequency at different temperature.

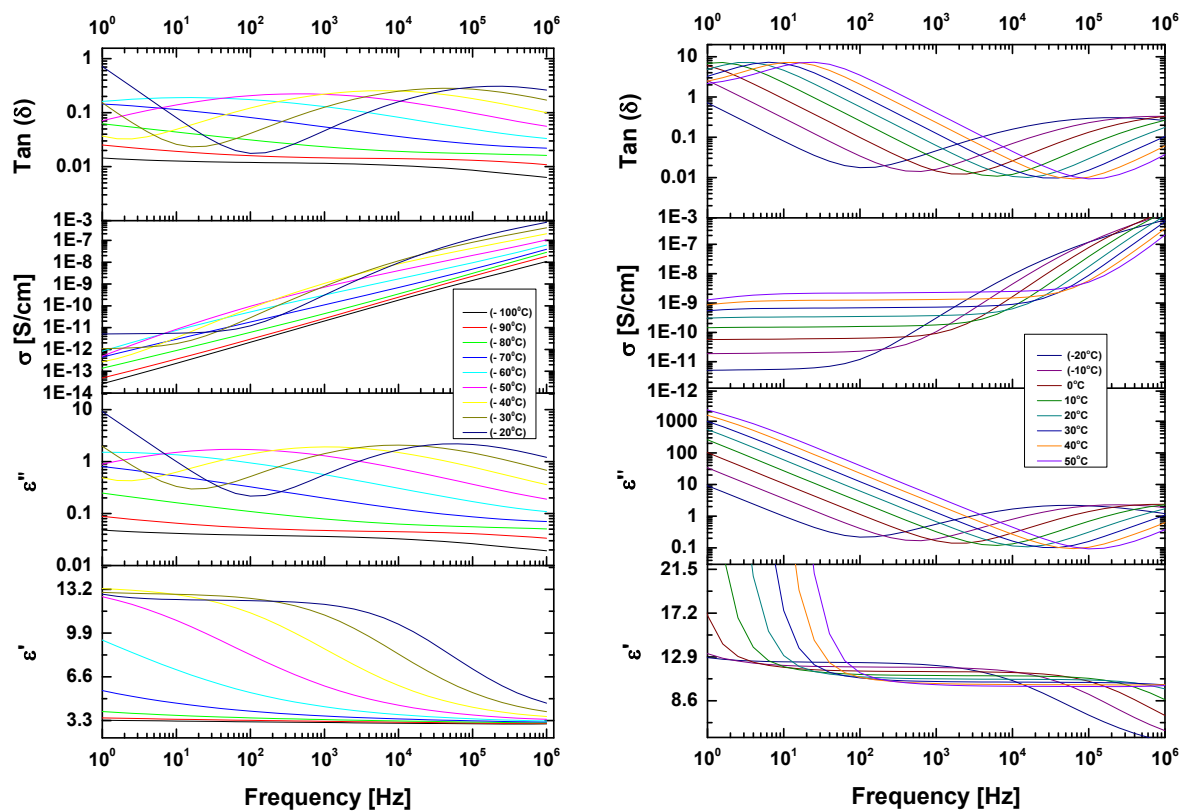

Figure S35: Dielectric properties of the *co-P-NA(1:1)* as function of frequency at different temperature.

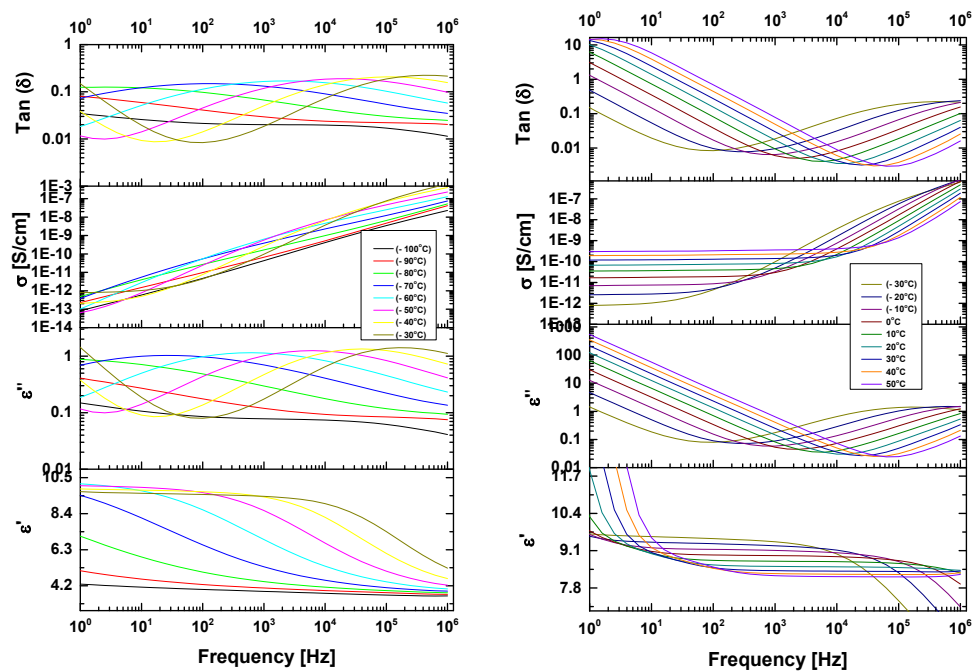

Figure S36: Dielectric properties of the *co-P-NA(2:1)* as function of frequency at different temperature.

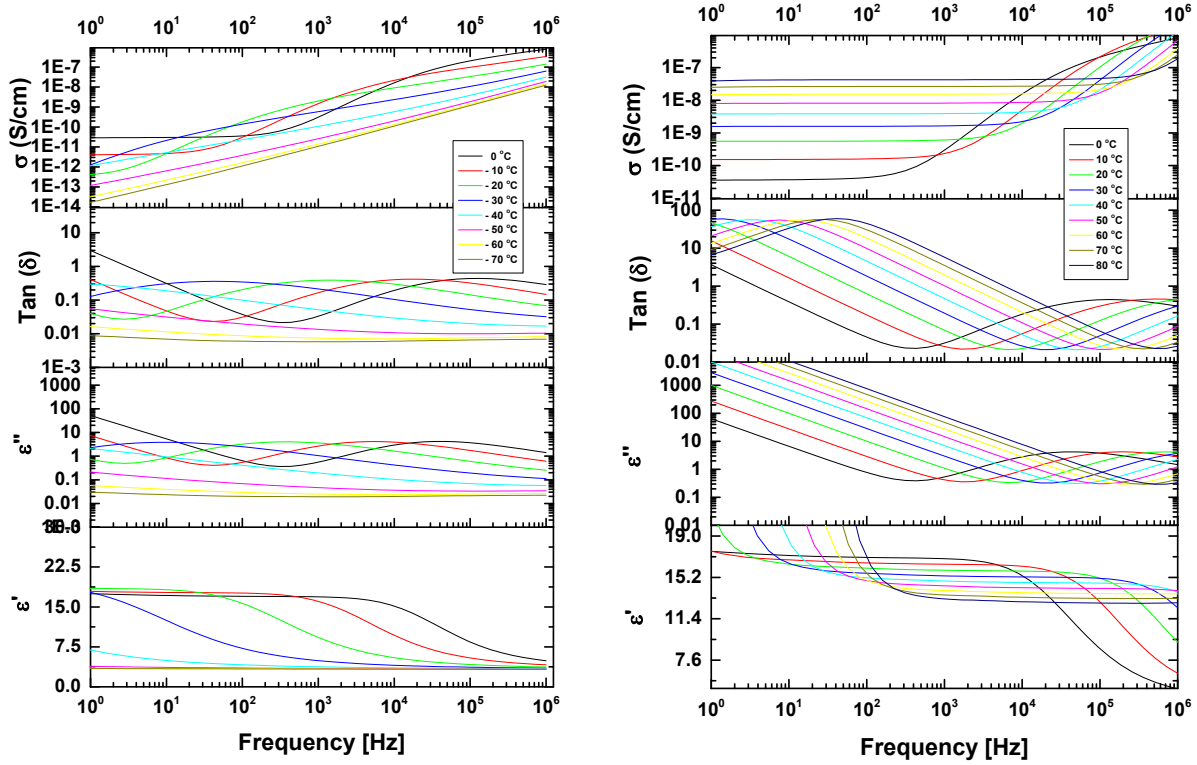

Figure S37: Dielectric properties of the P-MNA as function of frequency at different temperature.

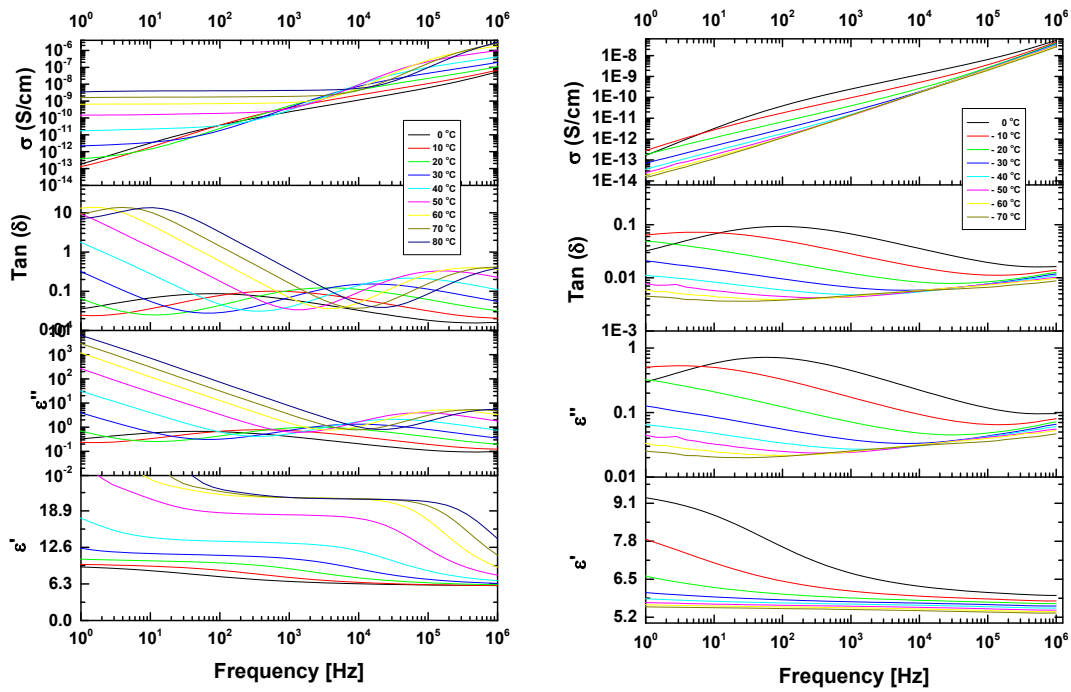

Figure S38: Dielectric properties of the P-MDR1 as function of frequency at different temperature.

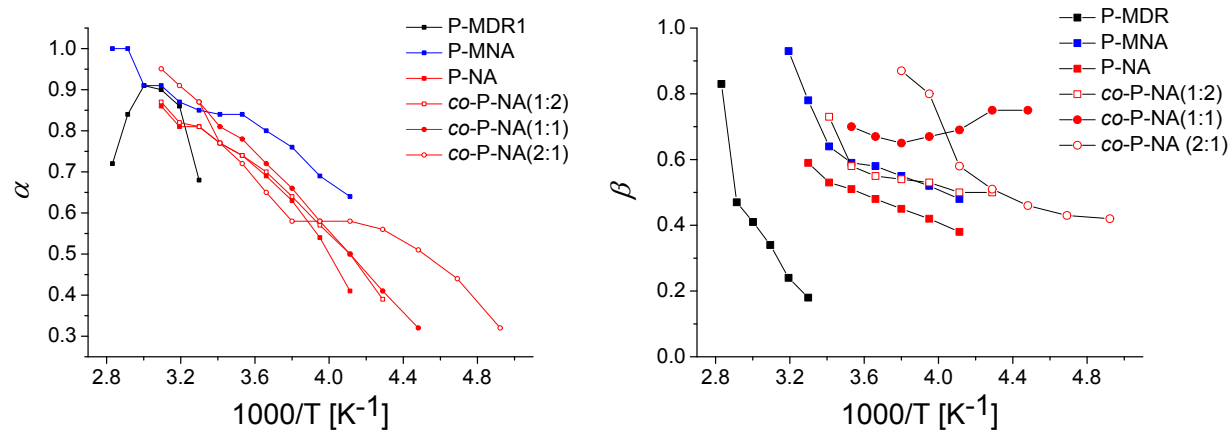

Figure S39: Characteristic exponents  $\alpha$  (left) and  $\beta$  (right) of the dipolar loss peak as function of temperature.

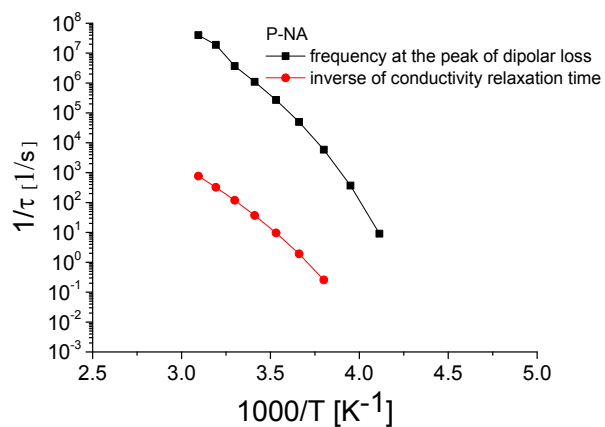

Figure 40: Frequency at the peak of dipolar loss and inverse of conductivity relaxation time as function of temperature for P-NA.

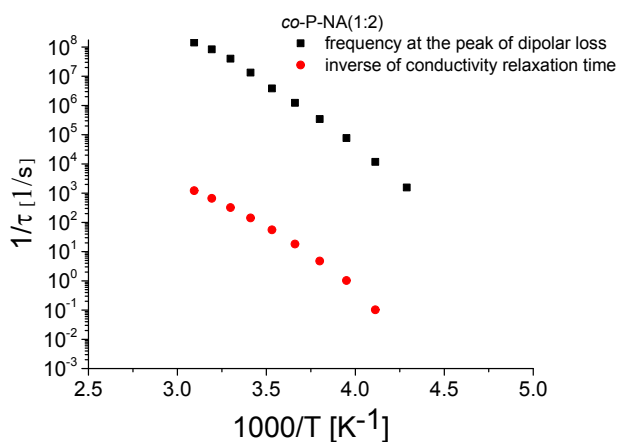

Figure 41: Frequency at the peak of dipolar loss and inverse of conductivity relaxation time as function of temperature for co-P-NA(1:2).

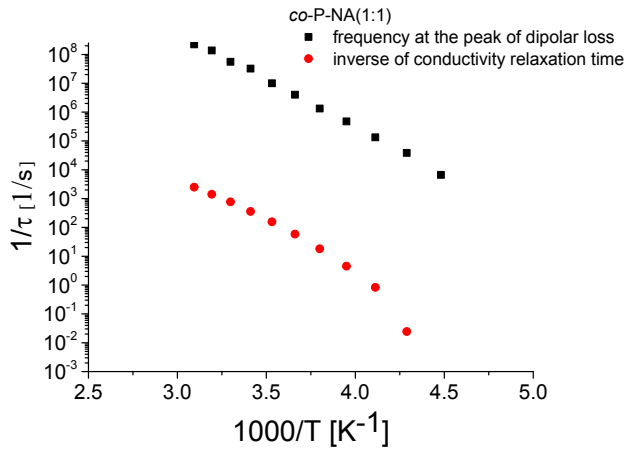

Figure 42: Frequency at the peak of dipolar loss and inverse of conductivity relaxation time as function of temperature for **co-P-NA(1:1)**.

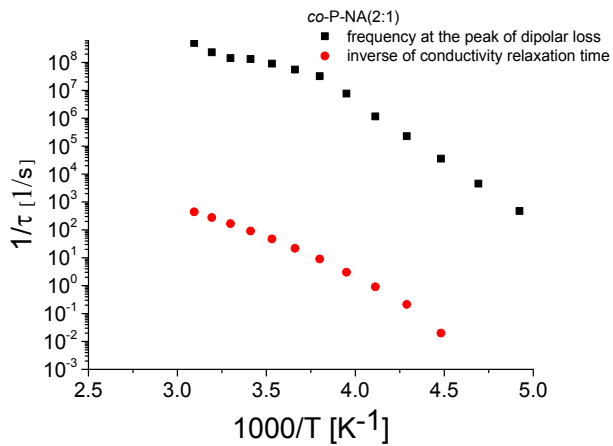

Figure 43: Frequency at the peak of dipolar loss and inverse of conductivity relaxation time as function of temperature for **co-P-NA(2:1)**.

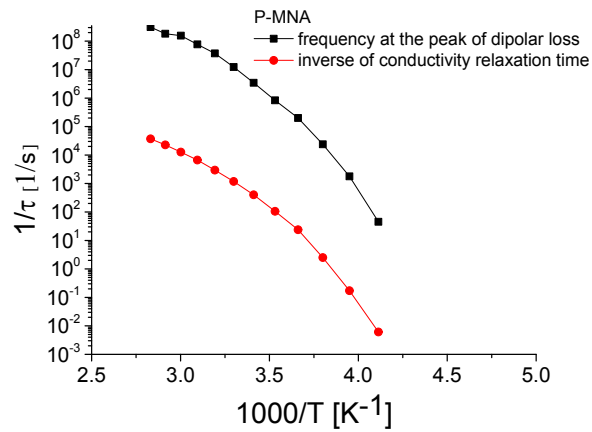

Figure 44: Frequency at the peak of dipolar loss and inverse of conductivity relaxation time as function of temperature for **P-MNA**.

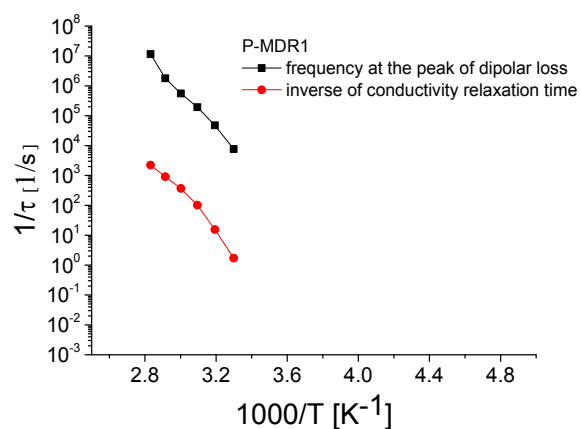

Figure 45: Frequency at the peak of dipolar loss and inverse of conductivity relaxation time as function of temperature for P-MDR1.

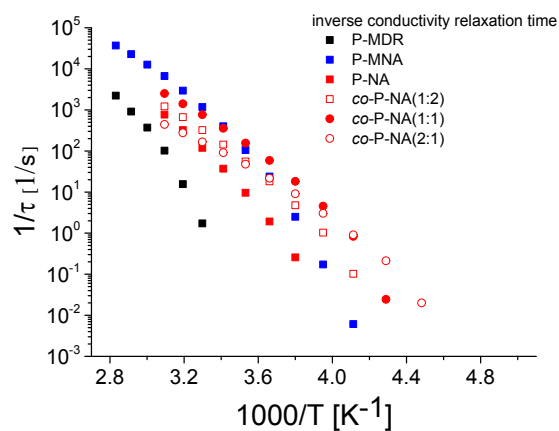

Figure 46: Inverse of conductivity relaxation time as function of temperature for all polymers.

Table 1S. Bond distances (Å) and angles (°) for **3** and **9**.

Compound **3**.

|        |          |         |          |
|--------|----------|---------|----------|
| Si1-O1 | 1.620(2) | Si4-C7  | 1.833(4) |
| Si1-O4 | 1.615(3) | O5-N2   | 1.234(4) |
| Si1-C1 | 1.838(4) | O6-N2   | 1.227(4) |
| Si1-C8 | 1.843(3) | N1-C10  | 1.457(4) |
| Si2-O1 | 1.609(2) | N1-C11  | 1.457(4) |
| Si2-O2 | 1.609(3) | N1-C12  | 1.363(4) |
| Si2-C2 | 1.831(4) | N2-C15  | 1.439(4) |
| Si2-C3 | 1.837(5) | C8-C9   | 1.527(5) |
| Si3-O2 | 1.607(3) | C9-C10  | 1.516(4) |
| Si3-O3 | 1.606(3) | C12-C13 | 1.402(4) |

|        |          |         |          |
|--------|----------|---------|----------|
| Si3-C4 | 1.829(5) | C12-C17 | 1.407(4) |
| Si3-C5 | 1.831(4) | C13-C14 | 1.367(4) |
| Si4-O3 | 1.609(3) | C14-C15 | 1.381(5) |
| Si4-O4 | 1.609(2) | C15-C16 | 1.383(4) |
| Si4-C6 | 1.833(4) | C16-C17 | 1.365(4) |

|           |            |             |            |
|-----------|------------|-------------|------------|
| O1-Si1-C1 | 109.90(19) | Si2-O1-Si1  | 153.73(16) |
| O1-Si1-C8 | 108.57(14) | Si3-O2-Si2  | 158.94(19) |
| O4-Si1-O1 | 108.95(14) | Si3-O3-Si4  | 158.8(2)   |
| O4-Si1-C1 | 110.25(18) | Si4-O4-Si1  | 158.64(17) |
| O4-Si1-C8 | 108.59(15) | C11-N1-C10  | 115.4(3)   |
| C1-Si1-C8 | 110.53(17) | C12-N1-C10  | 122.6(3)   |
| O1-Si2-C2 | 107.91(17) | C12-N1-C11  | 120.8(3)   |
| O1-Si2-C3 | 109.32(19) | O5-N2-C15   | 118.5(3)   |
| O2-Si2-O1 | 109.98(14) | O6-N2-O5    | 122.5(3)   |
| O2-Si2-C2 | 108.9(2)   | O6-N2-C15   | 119.0(3)   |
| O2-Si2-C3 | 109.3(2)   | C9-C8-Si1   | 115.5(2)   |
| C2-Si2-C3 | 111.3(2)   | C10-C9-C8   | 112.0(3)   |
| O2-Si3-C4 | 108.55(19) | N1-C10-C9   | 114.2(3)   |
| O2-Si3-C5 | 109.8(2)   | N1-C12-C13  | 121.1(3)   |
| O3-Si3-O2 | 110.05(14) | N1-C12-C17  | 121.1(3)   |
| O3-Si3-C4 | 108.1(2)   | C13-C12-C17 | 117.9(3)   |
| O3-Si3-C5 | 109.7(2)   | C14-C13-C12 | 120.9(3)   |
| C4-Si3-C5 | 110.6(2)   | C13-C14-C15 | 120.1(3)   |
| O3-Si4-O4 | 109.59(13) | C14-C15-N2  | 120.1(3)   |
| O3-Si4-C6 | 109.88(19) | C14-C15-C16 | 120.3(3)   |
| O3-Si4-C7 | 107.71(19) | C16-C15-N2  | 119.5(3)   |
| O4-Si4-C6 | 109.25(19) | C17-C16-C15 | 119.9(3)   |
| O4-Si4-C7 | 109.30(17) | C16-C17-C12 | 121.0(3)   |
| C7-Si4-C6 | 111.1(2)   |             |            |

**Compound 9.**

|        |           |         |           |
|--------|-----------|---------|-----------|
| Si1-O1 | 1.612(4)  | N1-C16  | 1.369(6)  |
| Si1-O4 | 1.598(4)  | N4-C25  | 1.436(7)  |
| Si1-C1 | 1.848(8)  | C8-C9   | 1.467(8)  |
| Si1-C8 | 1.847(6)  | C9-C10  | 1.545(8)  |
| Si2-O1 | 1.620(4)  | C9-C11  | 1.519(7)  |
| Si2-C2 | 1.818(8)  | C12-C13 | 1.482(8)  |
| Si2-C3 | 1.827(8)  | C14-C15 | 1.510(9)  |
| Si2-O2 | 1.626(6)  | C16-C17 | 1.399(6)  |
| Si3-O2 | 1.618(6)  | C16-C21 | 1.397(7)  |
| Si3-O3 | 1.628(5)  | N2-N3   | 1.239(12) |
| Si3-C4 | 1.837(9)  | N2-C19  | 1.405(9)  |
| Si3-C5 | 1.833(10) | N3-C22  | 1.446(10) |
| Si4-O4 | 1.620(4)  | C17-C18 | 1.382(7)  |
| Si4-C6 | 1.835(9)  | C18-C19 | 1.395(7)  |



|        |          |         |          |
|--------|----------|---------|----------|
| Si4-C7 | 1.815(7) | C19-C20 | 1.390(6) |
| Si4-O3 | 1.626(5) | C20-C21 | 1.387(7) |
| O5-C11 | 1.195(6) | C23-C24 | 1.39     |
| O6-C11 | 1.341(7) | C23-C22 | 1.39     |
| O6-C12 | 1.461(6) | C24-C25 | 1.39     |
| O7-N4  | 1.213(6) | C25-C26 | 1.39     |
| O8-N4  | 1.224(6) | C26-C27 | 1.39     |
| N1-C13 | 1.482(6) | C27-C22 | 1.39     |
| N1-C14 | 1.441(7) |         |          |

|            |          |             |           |
|------------|----------|-------------|-----------|
| O1-Si1-C1  | 109.3(3) | C8-C9-C10   | 114.3(5)  |
| O1-Si1-C8  | 110.6(2) | C8-C9-C11   | 113.0(5)  |
| O4-Si1-O1  | 108.8(2) | C11-C9-C10  | 108.2(5)  |
| O4-Si1-C1  | 109.0(3) | O5-C11-O6   | 123.4(5)  |
| O4-Si1-C8  | 111.2(3) | O5-C11-C9   | 126.6(5)  |
| C8-Si1-C1  | 107.9(3) | O6-C11-C9   | 109.9(5)  |
| O1-Si2-C2  | 110.0(3) | O6-C12-C13  | 111.0(5)  |
| O1-Si2-C3  | 108.7(3) | N1-C13-C12  | 108.8(5)  |
| O1-Si2-O2  | 109.0(4) | N1-C14-C15  | 113.7(5)  |
| C2-Si2-C3  | 110.5(5) | N1-C16-C17  | 117.1(6)  |
| O2-Si2-C2  | 102.4(6) | N1-C16-C21  | 125.3(6)  |
| O2-Si2-C3  | 116.1(6) | C21-C16-C17 | 117.3(7)  |
| O2-Si3-O3  | 106.5(6) | Si3-O2-Si2  | 148.0(9)  |
| O2-Si3-C4  | 98.6(9)  | Si4-O3-Si3  | 149.9(8)  |
| O2-Si3-C5  | 123.8(9) | N3-N2-C19   | 113.1(9)  |
| O3-Si3-C4  | 97.8(9)  | N2-N3-C22   | 112.9(8)  |
| O3-Si3-C5  | 122.9(9) | C18-C17-C16 | 120.6(10) |
| C5-Si3-C4  | 99.4(12) | C17-C18-C19 | 122.1(10) |
| O4-Si4-C6  | 110.2(4) | C18-C19-N2  | 117.2(8)  |
| O4-Si4-C7  | 107.6(3) | C20-C19-N2  | 125.8(9)  |
| O4-Si4-O3  | 110.4(3) | C20-C19-C18 | 117.0(8)  |
| C7-Si4-C6  | 110.3(5) | C21-C20-C19 | 121.4(10) |
| O3-Si4-C6  | 101.3(5) | C20-C21-C16 | 121.2(9)  |
| O3-Si4-C7  | 116.9(5) | C24-C23-C22 | 120.0     |
| Si1-O1-Si2 | 153.3(3) | C25-C24-C23 | 120.0     |
| Si1-O4-Si4 | 150.8(3) | C24-C25-N4  | 123.4(6)  |
| C11-O6-C12 | 116.2(4) | C24-C25-C26 | 120.0     |
| C14-N1-C13 | 116.8(5) | C26-C25-N4  | 116.5(6)  |
| C16-N1-C13 | 120.3(4) | C27-C26-C25 | 120.0     |
| C16-N1-C14 | 122.6(4) | C22-C27-C26 | 120.0     |
| O7-N4-O8   | 123.7(6) | C23-C22-N3  | 124.4(6)  |
| O7-N4-C25  | 116.6(6) | C27-C22-N3  | 115.5(6)  |
| O8-N4-C25  | 119.6(7) | C27-C22-C23 | 120.0     |
| C9-C8-Si1  | 117.6(4) |             |           |

Substanz: **2**

Molekularformel: C<sub>10</sub> H<sub>12</sub> N<sub>2</sub> O<sub>2</sub>

Mr = 192,22 g/mol

Bestimmungen: C H N O

---

**M-160916**

Berechnete Gewichtsanteile:

[C] 62,49%      [H] 6,29%      [N] 14,57%      [O] 16,65%

---

Gefundene Gewichtsanteile:

Einwaage: 1,058mg      LECO TruSpec Micro  
[C] **62,47%**      [H] **6,27%**      [N] **14,74%**

Einwaage: 2,758mg      LECO RO-478  
[O] **16,53%**

Elemental analysis of **2**.

Substanz: **3**

Molekularformel: C<sub>17</sub> H<sub>34</sub> N<sub>2</sub> O<sub>6</sub> Si<sub>4</sub>

Mr = 474.81g/mol

Bestimmungen: C H N

---

**M-163811**

Berechnete Gewichtsanteile:

[C] 43.00%      [H] 7.22%      [N] 5.90%      [O] 20.22%      [Si] 23.66%

---

Gefundene Gewichtsanteile:

Einwaage: 0.997mg      LECO TruSpec Micro  
[C] **42.97%**      [H] **7.18%**      [N] **6.02%**

Elemental analysis of **3**.

Substanz: **5**  
Molekularformel: C13 H16 N2 O4  
Bestimmungen: C H N

Mr = 264.28g/mol

---

**M-163825**

Berechnete Gewichtsanteile:

[C] 59.08%      [H] 6.10%      [N] 10.60%      [O] 24.22%

---

Gefundene Gewichtsanteile:

Einwaage: 1.128mg      LECO TruSpec Micro  
[C] 58.81%      [H] 6.14%      [N] 10.64%

Elemental analysis of **5**.

Substanz: **6**  
Molekularformel: C20 H38 N2 O8 Si4  
Bestimmungen: C H N

Mr = 546.87g/mol

---

**M-163832**

Berechnete Gewichtsanteile:

[C] 43.93%      [H] 7.00%      [N] 5.12%      [O] 23.41%      [Si] 20.54%

---

Gefundene Gewichtsanteile:

Einwaage: 1.253mg      LECO TruSpec Micro  
[C] 43.71%      [H] 6.94%      [N] 5.00%

Elemental analysis of **6**.

Substanz: **8**  
Molekularformel: C20 H22 N4 O4  
Bestimmungen: C H N

Mr = 382.42g/mol

---

**M-163826**

Berechnete Gewichtsanteile:

[C] 62.82%      [H] 5.80%      [N] 14.65%      [O] 16.73%

---

Gefundene Gewichtsanteile:

Einwaage: 1.015mg      LECO TruSpec Micro  
[C] 62.84%      [H] 5.89%      [N] 14.36%

Elemental analysis of **8**.

Substanz: **9**  
Molekularformel: C<sub>27</sub> H<sub>44</sub> N<sub>4</sub> O<sub>8</sub> Si<sub>4</sub>  
Bestimmungen: C H N

Mr = 665.01g/mol

---

**M-163821**

Berechnete Gewichtsanteile:

[C] 48.77%      [H] 6.67%      [N] 8.42%      [O] 19.25%      [Si] 16.89%

---

Gefundene Gewichtsanteile:

Einwaage: 0.919mg      LECO TruSpec Micro  
[C] 49.03%      [H] 6.72%      [N] 8.44%

Elemental analysis of **9**.

Substanz: **P-NA**  
Molekularformel:  
Bestimmungen: C H N

---

**M-160927**

Berechnete Gewichtsanteile: ---

---

Gefundene Gewichtsanteile:

Einwaage: 1,539mg      LECO TruSpec Micro  
[C] 43,16%      [H] 7,45%      [N] 6,54%

Einwaage: 1,546mg      LECO TruSpec Micro  
[C] 43,33%      [H] 7,41%      [N] 6,43%

Elemental analysis of **P-NA**.

Substanz: **co-P-NA(1:2)**  
Molekularformel:  
Bestimmungen: C H N

---

**M- 160930**

Berechnete Gewichtsanteile: --↓

---

Gefundene Gewichtsanteile:

Einwaage: 1,557mg  
[C] 41,30% [H] 7,83% [N] 4,71% LECO TruSpec Micro

Einwaage: 1,559mg  
[C] 41,14% [H] 7,76% [N] 4,67% LECO TruSpec Micro

Elemental analysis of **co-P-NA(1:2)**.

Substanz: **co-P-NA(1:1)**  
Molekularformel:  
Bestimmungen: C H N

---

**M- 160928**

Berechnete Gewichtsanteile: ---

---

Gefundene Gewichtsanteile:

Einwaage: 1,474mg  
[C] 38,98% [H] 7,80% [N] 4,05% LECO TruSpec Micro

Einwaage: 1,519mg  
[C] 38,93% [H] 7,86% [N] 3,89% LECO TruSpec Micro

Elemental analysis of **co-P-NA(1:1)**.

Substanz: **co-P-NA(2:1)**  
Molekularformel:  
Bestimmungen: C H N

---

### M-160929

Berechnete Gewichtsanteile: ---

---

Gefundene Gewichtsanteile:

Einwaage: 1,539mg LECO TruSpec Micro  
[C] 37,67% [H] 8,12% [N] 2,76%

Einwaage: 1,522mg LECO TruSpec Micro  
[C] 37,48% [H] 8,19% [N] 2,93%

Elemental analysis of **co-P-NA(2:1)**.

Substanz: **P-MNA**  
Molekularformel: C<sub>20</sub> H<sub>38</sub> N<sub>2</sub> O<sub>8</sub> Si<sub>4</sub> Mr = 546.87g/mol  
Bestimmungen: C H N

---

### M-163828

Berechnete Gewichtsanteile:

[C] 43.93% [H] 7.00% [N] 5.12% [O] 23.41% [Si] 20.54%

---

Gefundene Gewichtsanteile:

Einwaage: 1.013mg LECO TruSpec Micro  
[C] 43.81% [H] 7.07% [N] 5.20%

Elemental analysis of **P-MNA**.

Substanz: **P-MDR1**  
Molekularformel: C<sub>27</sub> H<sub>44</sub> N<sub>4</sub> O<sub>8</sub> Si<sub>4</sub> Mr = 665.01g/mol  
Bestimmungen: C H N

---

### M-163813

Berechnete Gewichtsanteile:

[C] 48.77% [H] 6.67% [N] 8.42% [O] 19.25% [Si] 16.89%

---

Gefundene Gewichtsanteile:

Einwaage: 0.880mg LECO TruSpec Micro  
[C] 48.64% [H] 6.75% [N] 8.67%

Elemental analysis of **P-MDR1**.
